# Supplementary material
Source: publisher figshare collection journal article supplement (https://springernature.figshare.com/ndownloader/files/17563121)
Supplement: Supplementary file 1 [file 17563121]

**SUPPLEMENTARY MATERIALS**

**Table S1.** OTU, taxon and group of individual clones in a recycled irrigation system across seasons

| **Season** | **Pond** | **Sequence** | **Group** | **Tax** | **OTU** |
| --- | --- | --- | --- | --- | --- |
| Spring | VA10 | 1204VA10-57 | CYA | Microcystis | Otu001 |
| Summer | VA12 | 1207VA12-1 | CYA | Microcystis | Otu001 |
| Summer | VA12 | 1207VA12-100 | CYA | Microcystis | Otu001 |
| Summer | VA12 | 1207VA12-14 | CYA | Microcystis | Otu001 |
| Summer | VA12 | 1207VA12-19 | CYA | Microcystis | Otu001 |
| Summer | VA12 | 1207VA12-2 | CYA | Microcystis | Otu001 |
| Summer | VA12 | 1207VA12-27 | CYA | Microcystis | Otu001 |
| Summer | VA12 | 1207VA12-33 | CYA | Microcystis | Otu001 |
| Summer | VA12 | 1207VA12-34 | CYA | Microcystis | Otu001 |
| Summer | VA12 | 1207VA12-36 | CYA | Microcystis | Otu001 |
| Summer | VA12 | 1207VA12-38 | CYA | Microcystis | Otu001 |
| Summer | VA12 | 1207VA12-40 | CYA | Microcystis | Otu001 |
| Summer | VA12 | 1207VA12-75 | CYA | Microcystis | Otu001 |
| Summer | VA12 | 1207VA12-78 | CYA | Microcystis | Otu001 |
| Summer | VA12 | 1207VA12-81 | CYA | Microcystis | Otu001 |
| Summer | VA12 | 1207VA12-82 | CYA | Microcystis | Otu001 |
| Summer | VA12 | 1207VA12-88 | CYA | Microcystis | Otu001 |
| Summer | VA13 | 1207VA13-1 | CYA | Microcystis | Otu001 |
| Summer | VA13 | 1207VA13-100 | CYA | Microcystis | Otu001 |
| Summer | VA13 | 1207VA13-104 | CYA | Microcystis | Otu001 |
| Summer | VA13 | 1207VA13-17 | CYA | Microcystis | Otu001 |
| Summer | VA13 | 1207VA13-19 | CYA | Microcystis | Otu001 |
| Summer | VA13 | 1207VA13-2 | CYA | Microcystis | Otu001 |
| Summer | VA13 | 1207VA13-21 | CYA | Microcystis | Otu001 |
| Summer | VA13 | 1207VA13-22n | CYA | Microcystis | Otu001 |
| Summer | VA13 | 1207VA13-23n | CYA | Microcystis | Otu001 |
| Summer | VA13 | 1207VA13-24 | CYA | Microcystis | Otu001 |
| Summer | VA13 | 1207VA13-28 | CYA | Microcystis | Otu001 |
| Summer | VA13 | 1207VA13-3 | CYA | Microcystis | Otu001 |
| Summer | VA13 | 1207VA13-31 | CYA | Microcystis | Otu001 |
| Summer | VA13 | 1207VA13-34 | CYA | Microcystis | Otu001 |
| Summer | VA13 | 1207VA13-35 | CYA | Microcystis | Otu001 |
| Summer | VA13 | 1207VA13-38 | CYA | Microcystis | Otu001 |
| Summer | VA13 | 1207VA13-39 | CYA | Microcystis | Otu001 |
| Summer | VA13 | 1207VA13-4 | CYA | Microcystis | Otu001 |
| Summer | VA13 | 1207VA13-40 | CYA | Microcystis | Otu001 |
| Summer | VA13 | 1207VA13-46 | CYA | Microcystis | Otu001 |
| Summer | VA13 | 1207VA13-49 | CYA | Microcystis | Otu001 |
| Summer | VA13 | 1207VA13-55n | CYA | Microcystis | Otu001 |
| Summer | VA13 | 1207VA13-57n | CYA | Microcystis | Otu001 |
| Summer | VA13 | 1207VA13-58 | CYA | Microcystis | Otu001 |
| Summer | VA13 | 1207VA13-59 | CYA | Microcystis | Otu001 |
| Summer | VA13 | 1207VA13-6 | CYA | Microcystis | Otu001 |
| Summer | VA13 | 1207VA13-60 | CYA | Microcystis | Otu001 |
| Summer | VA13 | 1207VA13-74 | CYA | Microcystis | Otu001 |
| Summer | VA13 | 1207VA13-82 | CYA | Microcystis | Otu001 |
| Summer | VA13 | 1207VA13-85 | CYA | Microcystis | Otu001 |
| Summer | VA13 | 1207VA13-86 | CYA | Microcystis | Otu001 |
| Summer | VA13 | 1207VA13-89 | CYA | Microcystis | Otu001 |
| Summer | VA13 | 1207VA13-94 | CYA | Microcystis | Otu001 |
| Summer | VA13 | 1207VA13-95n | CYA | Microcystis | Otu001 |
| Summer | VA13 | 1207VA13-97 | CYA | Microcystis | Otu001 |
| Summer | VA13 | 1207VA13-98 | CYA | Microcystis | Otu001 |
| Summer | VA13 | 1207VA13-99 | CYA | Microcystis | Otu001 |
| Fall | VA12 | 1210VA12-1 | CYA | Microcystis | Otu001 |
| Fall | VA12 | 1210VA12-100 | CYA | Microcystis | Otu001 |
| Fall | VA12 | 1210VA12-101 | CYA | Microcystis | Otu001 |
| Fall | VA12 | 1210VA12-102 | CYA | Microcystis | Otu001 |
| Fall | VA12 | 1210VA12-106 | CYA | Microcystis | Otu001 |
| Fall | VA12 | 1210VA12-108 | CYA | Microcystis | Otu001 |
| Fall | VA12 | 1210VA12-109 | CYA | Microcystis | Otu001 |
| Fall | VA12 | 1210VA12-111 | CYA | Microcystis | Otu001 |
| Fall | VA12 | 1210VA12-111n | CYA | Microcystis | Otu001 |
| Fall | VA12 | 1210VA12-112 | CYA | Microcystis | Otu001 |
| Fall | VA12 | 1210VA12-112n | CYA | Microcystis | Otu001 |
| Fall | VA12 | 1210VA12-113 | CYA | Microcystis | Otu001 |
| Fall | VA12 | 1210VA12-114 | CYA | Microcystis | Otu001 |
| Fall | VA12 | 1210VA12-115 | CYA | Microcystis | Otu001 |
| Fall | VA12 | 1210VA12-117 | CYA | Microcystis | Otu001 |
| Fall | VA12 | 1210VA12-12 | CYA | Microcystis | Otu001 |
| Fall | VA12 | 1210VA12-13 | CYA | Microcystis | Otu001 |
| Fall | VA12 | 1210VA12-16 | CYA | Microcystis | Otu001 |
| Fall | VA12 | 1210VA12-17 | CYA | Microcystis | Otu001 |
| Fall | VA12 | 1210VA12-18 | CYA | Microcystis | Otu001 |
| Fall | VA12 | 1210VA12-19 | CYA | Microcystis | Otu001 |
| Fall | VA12 | 1210VA12-2 | CYA | Microcystis | Otu001 |
| Fall | VA12 | 1210VA12-20 | CYA | Microcystis | Otu001 |
| Fall | VA12 | 1210VA12-22 | CYA | Microcystis | Otu001 |
| Fall | VA12 | 1210VA12-23 | CYA | Microcystis | Otu001 |
| Fall | VA12 | 1210VA12-24 | CYA | Microcystis | Otu001 |
| Fall | VA12 | 1210VA12-25 | CYA | Microcystis | Otu001 |
| Fall | VA12 | 1210VA12-26 | CYA | Microcystis | Otu001 |
| Fall | VA12 | 1210VA12-3 | CYA | Microcystis | Otu001 |
| Fall | VA12 | 1210VA12-30 | CYA | Microcystis | Otu001 |
| Fall | VA12 | 1210VA12-31 | CYA | Microcystis | Otu001 |
| Fall | VA12 | 1210VA12-32 | CYA | Microcystis | Otu001 |
| Fall | VA12 | 1210VA12-33 | CYA | Microcystis | Otu001 |
| Fall | VA12 | 1210VA12-36 | CYA | Microcystis | Otu001 |
| Fall | VA12 | 1210VA12-40 | CYA | Microcystis | Otu001 |
| Fall | VA12 | 1210VA12-42 | CYA | Microcystis | Otu001 |
| Fall | VA12 | 1210VA12-43 | CYA | Microcystis | Otu001 |
| Fall | VA12 | 1210VA12-44 | CYA | Microcystis | Otu001 |
| Fall | VA12 | 1210VA12-45 | CYA | Microcystis | Otu001 |
| Fall | VA12 | 1210VA12-46 | CYA | Microcystis | Otu001 |
| Fall | VA12 | 1210VA12-47 | CYA | Microcystis | Otu001 |
| Fall | VA12 | 1210VA12-5 | CYA | Microcystis | Otu001 |
| Fall | VA12 | 1210VA12-50 | CYA | Microcystis | Otu001 |
| Fall | VA12 | 1210VA12-51 | CYA | Microcystis | Otu001 |
| Fall | VA12 | 1210VA12-52 | CYA | Microcystis | Otu001 |
| Fall | VA12 | 1210VA12-53 | CYA | Microcystis | Otu001 |
| Fall | VA12 | 1210VA12-54 | CYA | Microcystis | Otu001 |
| Fall | VA12 | 1210VA12-57 | CYA | Microcystis | Otu001 |
| Fall | VA12 | 1210VA12-58 | CYA | Microcystis | Otu001 |
| Fall | VA12 | 1210VA12-59 | CYA | Microcystis | Otu001 |
| Fall | VA12 | 1210VA12-61 | CYA | Microcystis | Otu001 |
| Fall | VA12 | 1210VA12-64 | CYA | Microcystis | Otu001 |
| Fall | VA12 | 1210VA12-65 | CYA | Microcystis | Otu001 |
| Fall | VA12 | 1210VA12-66 | CYA | Microcystis | Otu001 |
| Fall | VA12 | 1210VA12-67 | CYA | Microcystis | Otu001 |
| Fall | VA12 | 1210VA12-69 | CYA | Microcystis | Otu001 |
| Fall | VA12 | 1210VA12-7 | CYA | Microcystis | Otu001 |
| Fall | VA12 | 1210VA12-70 | CYA | Microcystis | Otu001 |
| Fall | VA12 | 1210VA12-72 | CYA | Microcystis | Otu001 |
| Fall | VA12 | 1210VA12-73 | CYA | Microcystis | Otu001 |
| Fall | VA12 | 1210VA12-74 | CYA | Microcystis | Otu001 |
| Fall | VA12 | 1210VA12-75 | CYA | Microcystis | Otu001 |
| Fall | VA12 | 1210VA12-76 | CYA | Microcystis | Otu001 |
| Fall | VA12 | 1210VA12-78 | CYA | Microcystis | Otu001 |
| Fall | VA12 | 1210VA12-8 | CYA | Microcystis | Otu001 |
| Fall | VA12 | 1210VA12-80 | CYA | Microcystis | Otu001 |
| Fall | VA12 | 1210VA12-81 | CYA | Microcystis | Otu001 |
| Fall | VA12 | 1210VA12-82 | CYA | Microcystis | Otu001 |
| Fall | VA12 | 1210VA12-83 | CYA | Microcystis | Otu001 |
| Fall | VA12 | 1210VA12-84 | CYA | Microcystis | Otu001 |
| Fall | VA12 | 1210VA12-85 | CYA | Microcystis | Otu001 |
| Fall | VA12 | 1210VA12-86 | CYA | Microcystis | Otu001 |
| Fall | VA12 | 1210VA12-87 | CYA | Microcystis | Otu001 |
| Fall | VA12 | 1210VA12-90 | CYA | Microcystis | Otu001 |
| Fall | VA12 | 1210VA12-91 | CYA | Microcystis | Otu001 |
| Fall | VA12 | 1210VA12-93 | CYA | Microcystis | Otu001 |
| Fall | VA12 | 1210VA12-95 | CYA | Microcystis | Otu001 |
| Fall | VA12 | 1210VA12-96 | CYA | Microcystis | Otu001 |
| Fall | VA12 | 1210VA12-98 | CYA | Microcystis | Otu001 |
| Fall | VA13 | 1210VA13-1 | CYA | Microcystis | Otu001 |
| Fall | VA13 | 1210VA13-10 | CYA | Microcystis | Otu001 |
| Fall | VA13 | 1210VA13-103 | CYA | Microcystis | Otu001 |
| Fall | VA13 | 1210VA13-104 | CYA | Microcystis | Otu001 |
| Fall | VA13 | 1210VA13-105 | CYA | Microcystis | Otu001 |
| Fall | VA13 | 1210VA13-106 | CYA | Microcystis | Otu001 |
| Fall | VA13 | 1210VA13-107 | CYA | Microcystis | Otu001 |
| Fall | VA13 | 1210VA13-108 | CYA | Microcystis | Otu001 |
| Fall | VA13 | 1210VA13-11 | CYA | Microcystis | Otu001 |
| Fall | VA13 | 1210VA13-12 | CYA | Microcystis | Otu001 |
| Fall | VA13 | 1210VA13-13 | CYA | Microcystis | Otu001 |
| Fall | VA13 | 1210VA13-14 | CYA | Microcystis | Otu001 |
| Fall | VA13 | 1210VA13-15 | CYA | Microcystis | Otu001 |
| Fall | VA13 | 1210VA13-16 | CYA | Microcystis | Otu001 |
| Fall | VA13 | 1210VA13-17 | CYA | Microcystis | Otu001 |
| Fall | VA13 | 1210VA13-19 | CYA | Microcystis | Otu001 |
| Fall | VA13 | 1210VA13-2 | CYA | Microcystis | Otu001 |
| Fall | VA13 | 1210VA13-20 | CYA | Microcystis | Otu001 |
| Fall | VA13 | 1210VA13-21 | CYA | Microcystis | Otu001 |
| Fall | VA13 | 1210VA13-22 | CYA | Microcystis | Otu001 |
| Fall | VA13 | 1210VA13-23 | CYA | Microcystis | Otu001 |
| Fall | VA13 | 1210VA13-24 | CYA | Microcystis | Otu001 |
| Fall | VA13 | 1210VA13-25 | CYA | Microcystis | Otu001 |
| Fall | VA13 | 1210VA13-26 | CYA | Microcystis | Otu001 |
| Fall | VA13 | 1210VA13-27 | CYA | Microcystis | Otu001 |
| Fall | VA13 | 1210VA13-28 | CYA | Microcystis | Otu001 |
| Fall | VA13 | 1210VA13-29 | CYA | Microcystis | Otu001 |
| Fall | VA13 | 1210VA13-3 | CYA | Microcystis | Otu001 |
| Fall | VA13 | 1210VA13-30 | CYA | Microcystis | Otu001 |
| Fall | VA13 | 1210VA13-31 | CYA | Microcystis | Otu001 |
| Fall | VA13 | 1210VA13-32 | CYA | Microcystis | Otu001 |
| Fall | VA13 | 1210VA13-33 | CYA | Microcystis | Otu001 |
| Fall | VA13 | 1210VA13-34 | CYA | Microcystis | Otu001 |
| Fall | VA13 | 1210VA13-35 | CYA | Microcystis | Otu001 |
| Fall | VA13 | 1210VA13-36 | CYA | Microcystis | Otu001 |
| Fall | VA13 | 1210VA13-37 | CYA | Microcystis | Otu001 |
| Fall | VA13 | 1210VA13-38 | CYA | Microcystis | Otu001 |
| Fall | VA13 | 1210VA13-39 | CYA | Microcystis | Otu001 |
| Fall | VA13 | 1210VA13-4 | CYA | Microcystis | Otu001 |
| Fall | VA13 | 1210VA13-40 | CYA | Microcystis | Otu001 |
| Fall | VA13 | 1210VA13-41 | CYA | Microcystis | Otu001 |
| Fall | VA13 | 1210VA13-42 | CYA | Microcystis | Otu001 |
| Fall | VA13 | 1210VA13-43 | CYA | Microcystis | Otu001 |
| Fall | VA13 | 1210VA13-46 | CYA | Microcystis | Otu001 |
| Fall | VA13 | 1210VA13-47 | CYA | Microcystis | Otu001 |
| Fall | VA13 | 1210VA13-48 | CYA | Microcystis | Otu001 |
| Fall | VA13 | 1210VA13-49 | CYA | Microcystis | Otu001 |
| Fall | VA13 | 1210VA13-5 | CYA | Microcystis | Otu001 |
| Fall | VA13 | 1210VA13-50 | CYA | Microcystis | Otu001 |
| Fall | VA13 | 1210VA13-52 | CYA | Microcystis | Otu001 |
| Fall | VA13 | 1210VA13-53 | CYA | Microcystis | Otu001 |
| Fall | VA13 | 1210VA13-54 | CYA | Microcystis | Otu001 |
| Fall | VA13 | 1210VA13-55 | CYA | Microcystis | Otu001 |
| Fall | VA13 | 1210VA13-56 | CYA | Microcystis | Otu001 |
| Fall | VA13 | 1210VA13-57 | CYA | Microcystis | Otu001 |
| Fall | VA13 | 1210VA13-58 | CYA | Microcystis | Otu001 |
| Fall | VA13 | 1210VA13-59 | CYA | Microcystis | Otu001 |
| Fall | VA13 | 1210VA13-6 | CYA | Microcystis | Otu001 |
| Fall | VA13 | 1210VA13-61 | CYA | Microcystis | Otu001 |
| Fall | VA13 | 1210VA13-62 | CYA | Microcystis | Otu001 |
| Fall | VA13 | 1210VA13-63 | CYA | Microcystis | Otu001 |
| Fall | VA13 | 1210VA13-64 | CYA | Microcystis | Otu001 |
| Fall | VA13 | 1210VA13-65 | CYA | Microcystis | Otu001 |
| Fall | VA13 | 1210VA13-66 | CYA | Microcystis | Otu001 |
| Fall | VA13 | 1210VA13-67 | CYA | Microcystis | Otu001 |
| Fall | VA13 | 1210VA13-68 | CYA | Microcystis | Otu001 |
| Fall | VA13 | 1210VA13-7 | CYA | Microcystis | Otu001 |
| Fall | VA13 | 1210VA13-70 | CYA | Microcystis | Otu001 |
| Fall | VA13 | 1210VA13-71 | CYA | Microcystis | Otu001 |
| Fall | VA13 | 1210VA13-72 | CYA | Microcystis | Otu001 |
| Fall | VA13 | 1210VA13-73 | CYA | Microcystis | Otu001 |
| Fall | VA13 | 1210VA13-74 | CYA | Microcystis | Otu001 |
| Fall | VA13 | 1210VA13-75 | CYA | Microcystis | Otu001 |
| Fall | VA13 | 1210VA13-76 | CYA | Microcystis | Otu001 |
| Fall | VA13 | 1210VA13-77 | CYA | Microcystis | Otu001 |
| Fall | VA13 | 1210VA13-78 | CYA | Microcystis | Otu001 |
| Fall | VA13 | 1210VA13-79 | CYA | Microcystis | Otu001 |
| Fall | VA13 | 1210VA13-8 | CYA | Microcystis | Otu001 |
| Fall | VA13 | 1210VA13-80 | CYA | Microcystis | Otu001 |
| Fall | VA13 | 1210VA13-81 | CYA | Microcystis | Otu001 |
| Fall | VA13 | 1210VA13-82 | CYA | Microcystis | Otu001 |
| Fall | VA13 | 1210VA13-83 | CYA | Microcystis | Otu001 |
| Fall | VA13 | 1210VA13-84 | CYA | Microcystis | Otu001 |
| Fall | VA13 | 1210VA13-85 | CYA | Microcystis | Otu001 |
| Fall | VA13 | 1210VA13-86 | CYA | Microcystis | Otu001 |
| Fall | VA13 | 1210VA13-87 | CYA | Microcystis | Otu001 |
| Fall | VA13 | 1210VA13-88 | CYA | Microcystis | Otu001 |
| Fall | VA13 | 1210VA13-89 | CYA | Microcystis | Otu001 |
| Fall | VA13 | 1210VA13-9 | CYA | Microcystis | Otu001 |
| Fall | VA13 | 1210VA13-90 | CYA | Microcystis | Otu001 |
| Fall | VA13 | 1210VA13-91 | CYA | Microcystis | Otu001 |
| Fall | VA13 | 1210VA13-92 | CYA | Microcystis | Otu001 |
| Fall | VA13 | 1210VA13-93 | CYA | Microcystis | Otu001 |
| Fall | VA13 | 1210VA13-94 | CYA | Microcystis | Otu001 |
| Fall | VA13 | 1210VA13-96 | CYA | Microcystis | Otu001 |
| Fall | VA13 | 1210VA13-97 | CYA | Microcystis | Otu001 |
| Fall | VA13 | 1210VA13-98 | CYA | Microcystis | Otu001 |
| Fall | VA13 | 1210VA13-99 | CYA | Microcystis | Otu001 |
| Winter | VA13 | 1301VA13-54 | CYA | Microcystis | Otu001 |
| Winter | VA13 | 1301VA13-72 | CYA | Microcystis | Otu001 |
| Winter | VA13 | 1301VA13-77 | CYA | Microcystis | Otu001 |
| Winter | VA13 | 1301VA13-81 | CYA | Microcystis | Otu001 |
| Spring | VA12 | 1204VA12-11 | EP | Chlorophyta | Otu002 |
| Spring | VA12 | 1204VA12-1n | EP | Chlorophyta | Otu002 |
| Spring | VA12 | 1204VA12-20n | EP | Chlorophyta | Otu002 |
| Spring | VA12 | 1204VA12-23 | EP | Chlorophyta | Otu002 |
| Spring | VA12 | 1204VA12-23n | EP | Chlorophyta | Otu002 |
| Spring | VA12 | 1204VA12-30n | EP | Chlorophyta | Otu002 |
| Spring | VA12 | 1204VA12-33 | EP | Chlorophyta | Otu002 |
| Spring | VA12 | 1204VA12-33n | EP | Chlorophyta | Otu002 |
| Spring | VA12 | 1204VA12-35n | EP | Chlorophyta | Otu002 |
| Spring | VA12 | 1204VA12-36n | EP | Chlorophyta | Otu002 |
| Spring | VA12 | 1204VA12-37n | EP | Chlorophyta | Otu002 |
| Spring | VA12 | 1204VA12-41 | EP | Chlorophyta | Otu002 |
| Spring | VA12 | 1204VA12-47n | EP | Chlorophyta | Otu002 |
| Spring | VA12 | 1204VA12-48 | EP | Chlorophyta | Otu002 |
| Spring | VA12 | 1204VA12-51n | EP | Chlorophyta | Otu002 |
| Spring | VA12 | 1204VA12-58 | EP | Chlorophyta | Otu002 |
| Spring | VA12 | 1204VA12-7 | EP | Chlorophyta | Otu002 |
| Spring | VA12 | 1204VA12-76 | EP | Chlorophyta | Otu002 |
| Spring | VA12 | 1204VA12-78 | EP | Chlorophyta | Otu002 |
| Spring | VA13 | 1204VA13-1 | EP | Chlorophyta | Otu002 |
| Spring | VA13 | 1204VA13-10 | EP | Chlorophyta | Otu002 |
| Spring | VA13 | 1204VA13-11 | EP | Chlorophyta | Otu002 |
| Spring | VA13 | 1204VA13-12 | EP | Chlorophyta | Otu002 |
| Spring | VA13 | 1204VA13-13 | EP | Chlorophyta | Otu002 |
| Spring | VA13 | 1204VA13-14 | EP | Chlorophyta | Otu002 |
| Spring | VA13 | 1204VA13-15 | EP | Chlorophyta | Otu002 |
| Spring | VA13 | 1204VA13-16 | EP | Chlorophyta | Otu002 |
| Spring | VA13 | 1204VA13-17 | EP | Chlorophyta | Otu002 |
| Spring | VA13 | 1204VA13-19 | EP | Chlorophyta | Otu002 |
| Spring | VA13 | 1204VA13-20 | EP | Chlorophyta | Otu002 |
| Spring | VA13 | 1204VA13-21 | EP | Chlorophyta | Otu002 |
| Spring | VA13 | 1204VA13-22 | EP | Chlorophyta | Otu002 |
| Spring | VA13 | 1204VA13-23 | EP | Chlorophyta | Otu002 |
| Spring | VA13 | 1204VA13-24 | EP | Chlorophyta | Otu002 |
| Spring | VA13 | 1204VA13-25 | EP | Chlorophyta | Otu002 |
| Spring | VA13 | 1204VA13-26 | EP | Chlorophyta | Otu002 |
| Spring | VA13 | 1204VA13-27 | EP | Chlorophyta | Otu002 |
| Spring | VA13 | 1204VA13-28 | EP | Chlorophyta | Otu002 |
| Spring | VA13 | 1204VA13-29 | EP | Chlorophyta | Otu002 |
| Spring | VA13 | 1204VA13-3 | EP | Chlorophyta | Otu002 |
| Spring | VA13 | 1204VA13-30 | EP | Chlorophyta | Otu002 |
| Spring | VA13 | 1204VA13-31 | EP | Chlorophyta | Otu002 |
| Spring | VA13 | 1204VA13-32 | EP | Chlorophyta | Otu002 |
| Spring | VA13 | 1204VA13-34 | EP | Chlorophyta | Otu002 |
| Spring | VA13 | 1204VA13-36 | EP | Chlorophyta | Otu002 |
| Spring | VA13 | 1204VA13-37 | EP | Chlorophyta | Otu002 |
| Spring | VA13 | 1204VA13-38 | EP | Chlorophyta | Otu002 |
| Spring | VA13 | 1204VA13-39 | EP | Chlorophyta | Otu002 |
| Spring | VA13 | 1204VA13-4 | EP | Chlorophyta | Otu002 |
| Spring | VA13 | 1204VA13-40 | EP | Chlorophyta | Otu002 |
| Spring | VA13 | 1204VA13-41 | EP | Chlorophyta | Otu002 |
| Spring | VA13 | 1204VA13-43 | EP | Chlorophyta | Otu002 |
| Spring | VA13 | 1204VA13-44 | EP | Chlorophyta | Otu002 |
| Spring | VA13 | 1204VA13-45 | EP | Chlorophyta | Otu002 |
| Spring | VA13 | 1204VA13-47 | EP | Chlorophyta | Otu002 |
| Spring | VA13 | 1204VA13-48 | EP | Chlorophyta | Otu002 |
| Spring | VA13 | 1204VA13-49 | EP | Chlorophyta | Otu002 |
| Spring | VA13 | 1204VA13-5 | EP | Chlorophyta | Otu002 |
| Spring | VA13 | 1204VA13-50 | EP | Chlorophyta | Otu002 |
| Spring | VA13 | 1204VA13-51 | EP | Chlorophyta | Otu002 |
| Spring | VA13 | 1204VA13-53 | EP | Chlorophyta | Otu002 |
| Spring | VA13 | 1204VA13-54 | EP | Chlorophyta | Otu002 |
| Spring | VA13 | 1204VA13-55 | EP | Chlorophyta | Otu002 |
| Spring | VA13 | 1204VA13-56 | EP | Chlorophyta | Otu002 |
| Spring | VA13 | 1204VA13-57 | EP | Chlorophyta | Otu002 |
| Spring | VA13 | 1204VA13-58 | EP | Chlorophyta | Otu002 |
| Spring | VA13 | 1204VA13-59 | EP | Chlorophyta | Otu002 |
| Spring | VA13 | 1204VA13-6 | EP | Chlorophyta | Otu002 |
| Spring | VA13 | 1204VA13-60 | EP | Chlorophyta | Otu002 |
| Spring | VA13 | 1204VA13-63 | EP | Chlorophyta | Otu002 |
| Spring | VA13 | 1204VA13-64 | EP | Chlorophyta | Otu002 |
| Spring | VA13 | 1204VA13-65 | EP | Chlorophyta | Otu002 |
| Spring | VA13 | 1204VA13-66 | EP | Chlorophyta | Otu002 |
| Spring | VA13 | 1204VA13-67 | EP | Chlorophyta | Otu002 |
| Spring | VA13 | 1204VA13-68 | EP | Chlorophyta | Otu002 |
| Spring | VA13 | 1204VA13-69 | EP | Chlorophyta | Otu002 |
| Spring | VA13 | 1204VA13-7 | EP | Chlorophyta | Otu002 |
| Spring | VA13 | 1204VA13-70 | EP | Chlorophyta | Otu002 |
| Spring | VA13 | 1204VA13-71 | EP | Chlorophyta | Otu002 |
| Spring | VA13 | 1204VA13-72 | EP | Chlorophyta | Otu002 |
| Spring | VA13 | 1204VA13-74 | EP | Chlorophyta | Otu002 |
| Spring | VA13 | 1204VA13-76 | EP | Chlorophyta | Otu002 |
| Spring | VA13 | 1204VA13-77 | EP | Chlorophyta | Otu002 |
| Spring | VA13 | 1204VA13-78 | EP | Chlorophyta | Otu002 |
| Spring | VA13 | 1204VA13-79 | EP | Chlorophyta | Otu002 |
| Spring | VA13 | 1204VA13-8 | EP | Chlorophyta | Otu002 |
| Spring | VA13 | 1204VA13-80 | EP | Chlorophyta | Otu002 |
| Spring | VA13 | 1204VA13-81 | EP | Chlorophyta | Otu002 |
| Spring | VA13 | 1204VA13-82 | EP | Chlorophyta | Otu002 |
| Spring | VA13 | 1204VA13-85 | EP | Chlorophyta | Otu002 |
| Spring | VA13 | 1204VA13-86 | EP | Chlorophyta | Otu002 |
| Spring | VA13 | 1204VA13-87 | EP | Chlorophyta | Otu002 |
| Spring | VA13 | 1204VA13-88 | EP | Chlorophyta | Otu002 |
| Spring | VA13 | 1204VA13-9 | EP | Chlorophyta | Otu002 |
| Spring | VA13 | 1204VA13-90 | EP | Chlorophyta | Otu002 |
| Spring | VA13 | 1204VA13-91 | EP | Chlorophyta | Otu002 |
| Spring | VA13 | 1204VA13-92 | EP | Chlorophyta | Otu002 |
| Spring | VA13 | 1204VA13-93 | EP | Chlorophyta | Otu002 |
| Spring | VA13 | 1204VA13-95 | EP | Chlorophyta | Otu002 |
| Spring | VA13 | 1204VA13-96 | EP | Chlorophyta | Otu002 |
| Winter | VA13 | 1301VA13-40 | EP | Chlorophyta | Otu002 |
| Summer | VA12 | 1207VA12-116 | EP | Cryptophyta | Otu003 |
| Summer | VA12 | 1207VA12-16 | EP | Cryptophyta | Otu003 |
| Summer | VA12 | 1207VA12-17 | EP | Cryptophyta | Otu003 |
| Summer | VA12 | 1207VA12-22 | EP | Cryptophyta | Otu003 |
| Summer | VA12 | 1207VA12-26 | EP | Cryptophyta | Otu003 |
| Summer | VA12 | 1207VA12-41 | EP | Cryptophyta | Otu003 |
| Summer | VA12 | 1207VA12-5 | EP | Cryptophyta | Otu003 |
| Summer | VA12 | 1207VA12-84 | EP | Cryptophyta | Otu003 |
| Fall | VA10 | 1210VA10-156 | EP | Cryptophyta | Otu003 |
| Winter | VA10 | 1301VA10-183 | EP | Cryptophyta | Otu003 |
| Winter | VA12 | 1301VA12-1 | EP | Cryptophyta | Otu003 |
| Winter | VA12 | 1301VA12-10 | EP | Cryptophyta | Otu003 |
| Winter | VA12 | 1301VA12-100 | EP | Cryptophyta | Otu003 |
| Winter | VA12 | 1301VA12-113 | EP | Cryptophyta | Otu003 |
| Winter | VA12 | 1301VA12-119 | EP | Cryptophyta | Otu003 |
| Winter | VA12 | 1301VA12-12 | EP | Cryptophyta | Otu003 |
| Winter | VA12 | 1301VA12-13 | EP | Cryptophyta | Otu003 |
| Winter | VA12 | 1301VA12-14 | EP | Cryptophyta | Otu003 |
| Winter | VA12 | 1301VA12-17 | EP | Cryptophyta | Otu003 |
| Winter | VA12 | 1301VA12-20 | EP | Cryptophyta | Otu003 |
| Winter | VA12 | 1301VA12-22 | EP | Cryptophyta | Otu003 |
| Winter | VA12 | 1301VA12-25 | EP | Cryptophyta | Otu003 |
| Winter | VA12 | 1301VA12-3 | EP | Cryptophyta | Otu003 |
| Winter | VA12 | 1301VA12-30 | EP | Cryptophyta | Otu003 |
| Winter | VA12 | 1301VA12-33 | EP | Cryptophyta | Otu003 |
| Winter | VA12 | 1301VA12-38 | EP | Cryptophyta | Otu003 |
| Winter | VA12 | 1301VA12-4 | EP | Cryptophyta | Otu003 |
| Winter | VA12 | 1301VA12-40 | EP | Cryptophyta | Otu003 |
| Winter | VA12 | 1301VA12-42 | EP | Cryptophyta | Otu003 |
| Winter | VA12 | 1301VA12-44 | EP | Cryptophyta | Otu003 |
| Winter | VA12 | 1301VA12-47 | EP | Cryptophyta | Otu003 |
| Winter | VA12 | 1301VA12-48 | EP | Cryptophyta | Otu003 |
| Winter | VA12 | 1301VA12-52 | EP | Cryptophyta | Otu003 |
| Winter | VA12 | 1301VA12-53 | EP | Cryptophyta | Otu003 |
| Winter | VA12 | 1301VA12-54 | EP | Cryptophyta | Otu003 |
| Winter | VA12 | 1301VA12-56 | EP | Cryptophyta | Otu003 |
| Winter | VA12 | 1301VA12-58 | EP | Cryptophyta | Otu003 |
| Winter | VA12 | 1301VA12-59 | EP | Cryptophyta | Otu003 |
| Winter | VA12 | 1301VA12-62 | EP | Cryptophyta | Otu003 |
| Winter | VA12 | 1301VA12-64 | EP | Cryptophyta | Otu003 |
| Winter | VA12 | 1301VA12-67 | EP | Cryptophyta | Otu003 |
| Winter | VA12 | 1301VA12-68 | EP | Cryptophyta | Otu003 |
| Winter | VA12 | 1301VA12-7 | EP | Cryptophyta | Otu003 |
| Winter | VA12 | 1301VA12-71 | EP | Cryptophyta | Otu003 |
| Winter | VA12 | 1301VA12-74 | EP | Cryptophyta | Otu003 |
| Winter | VA12 | 1301VA12-79 | EP | Cryptophyta | Otu003 |
| Winter | VA12 | 1301VA12-80 | EP | Cryptophyta | Otu003 |
| Winter | VA12 | 1301VA12-81 | EP | Cryptophyta | Otu003 |
| Winter | VA12 | 1301VA12-87 | EP | Cryptophyta | Otu003 |
| Winter | VA12 | 1301VA12-90 | EP | Cryptophyta | Otu003 |
| Winter | VA12 | 1301VA12-93 | EP | Cryptophyta | Otu003 |
| Winter | VA12 | 1301VA12-94 | EP | Cryptophyta | Otu003 |
| Winter | VA12 | 1301VA12-95 | EP | Cryptophyta | Otu003 |
| Winter | VA12 | 1301VA12-97 | EP | Cryptophyta | Otu003 |
| Winter | VA12 | 1301VA12-98 | EP | Cryptophyta | Otu003 |
| Winter | VA12 | 1301VA12-99 | EP | Cryptophyta | Otu003 |
| Spring | VA12 | 1204VA12-44 | EP | UCE | Otu004 |
| Winter | VA13 | 1301VA13-10 | EP | UCE | Otu004 |
| Winter | VA13 | 1301VA13-103 | EP | UCE | Otu004 |
| Winter | VA13 | 1301VA13-107 | EP | UCE | Otu004 |
| Winter | VA13 | 1301VA13-108 | EP | UCE | Otu004 |
| Winter | VA13 | 1301VA13-12 | EP | UCE | Otu004 |
| Winter | VA13 | 1301VA13-13 | EP | UCE | Otu004 |
| Winter | VA13 | 1301VA13-16 | EP | UCE | Otu004 |
| Winter | VA13 | 1301VA13-17 | EP | UCE | Otu004 |
| Winter | VA13 | 1301VA13-18 | EP | UCE | Otu004 |
| Winter | VA13 | 1301VA13-20 | EP | UCE | Otu004 |
| Winter | VA13 | 1301VA13-30 | EP | UCE | Otu004 |
| Winter | VA13 | 1301VA13-31 | EP | UCE | Otu004 |
| Winter | VA13 | 1301VA13-33 | EP | UCE | Otu004 |
| Winter | VA13 | 1301VA13-34 | EP | UCE | Otu004 |
| Winter | VA13 | 1301VA13-35 | EP | UCE | Otu004 |
| Winter | VA13 | 1301VA13-36 | EP | UCE | Otu004 |
| Winter | VA13 | 1301VA13-38 | EP | UCE | Otu004 |
| Winter | VA13 | 1301VA13-44 | EP | UCE | Otu004 |
| Winter | VA13 | 1301VA13-46 | EP | UCE | Otu004 |
| Winter | VA13 | 1301VA13-47 | EP | UCE | Otu004 |
| Winter | VA13 | 1301VA13-50 | EP | UCE | Otu004 |
| Winter | VA13 | 1301VA13-51 | EP | UCE | Otu004 |
| Winter | VA13 | 1301VA13-52 | EP | UCE | Otu004 |
| Winter | VA13 | 1301VA13-55 | EP | UCE | Otu004 |
| Winter | VA13 | 1301VA13-58 | EP | UCE | Otu004 |
| Winter | VA13 | 1301VA13-60 | EP | UCE | Otu004 |
| Winter | VA13 | 1301VA13-64 | EP | UCE | Otu004 |
| Winter | VA13 | 1301VA13-65 | EP | UCE | Otu004 |
| Winter | VA13 | 1301VA13-66 | EP | UCE | Otu004 |
| Winter | VA13 | 1301VA13-69 | EP | UCE | Otu004 |
| Winter | VA13 | 1301VA13-71 | EP | UCE | Otu004 |
| Winter | VA13 | 1301VA13-74 | EP | UCE | Otu004 |
| Winter | VA13 | 1301VA13-75 | EP | UCE | Otu004 |
| Winter | VA13 | 1301VA13-78 | EP | UCE | Otu004 |
| Winter | VA13 | 1301VA13-82 | EP | UCE | Otu004 |
| Winter | VA13 | 1301VA13-84 | EP | UCE | Otu004 |
| Winter | VA13 | 1301VA13-84n | EP | UCE | Otu004 |
| Winter | VA13 | 1301VA13-85 | EP | UCE | Otu004 |
| Winter | VA13 | 1301VA13-86 | EP | UCE | Otu004 |
| Winter | VA13 | 1301VA13-89 | EP | UCE | Otu004 |
| Winter | VA13 | 1301VA13-9 | EP | UCE | Otu004 |
| Winter | VA13 | 1301VA13-90 | EP | UCE | Otu004 |
| Winter | VA13 | 1301VA13-90n | EP | UCE | Otu004 |
| Winter | VA13 | 1301VA13-92 | EP | UCE | Otu004 |
| Winter | VA13 | 1301VA13-92n | EP | UCE | Otu004 |
| Winter | VA13 | 1301VA13-95 | EP | UCE | Otu004 |
| Winter | VA13 | 1301VA13-97 | EP | UCE | Otu004 |
| Winter | VA13 | 1301VA13-99 | EP | UCE | Otu004 |
| Spring | VA12 | 1204VA12-68 | EP | Chlorophyta | Otu005 |
| Spring | VA12 | 1204VA12-77 | EP | Chlorophyta | Otu005 |
| Spring | VA13 | 1204VA13-18 | EP | Chlorophyta | Otu005 |
| Spring | VA13 | 1204VA13-46 | EP | Chlorophyta | Otu005 |
| Spring | VA13 | 1204VA13-52 | EP | Chlorophyta | Otu005 |
| Spring | VA13 | 1204VA13-84 | EP | Chlorophyta | Otu005 |
| Winter | VA11 | 1301VA11-124 | EP | Chlorophyta | Otu005 |
| Winter | VA11 | 1301VA11-2n | EP | Chlorophyta | Otu005 |
| Winter | VA12 | 1301VA12-120 | EP | Chlorophyta | Otu005 |
| Winter | VA12 | 1301VA12-15 | EP | Chlorophyta | Otu005 |
| Winter | VA12 | 1301VA12-19 | EP | Chlorophyta | Otu005 |
| Winter | VA12 | 1301VA12-23 | EP | Chlorophyta | Otu005 |
| Winter | VA12 | 1301VA12-24 | EP | Chlorophyta | Otu005 |
| Winter | VA12 | 1301VA12-36 | EP | Chlorophyta | Otu005 |
| Winter | VA12 | 1301VA12-41 | EP | Chlorophyta | Otu005 |
| Winter | VA12 | 1301VA12-45 | EP | Chlorophyta | Otu005 |
| Winter | VA12 | 1301VA12-46 | EP | Chlorophyta | Otu005 |
| Winter | VA12 | 1301VA12-49 | EP | Chlorophyta | Otu005 |
| Winter | VA12 | 1301VA12-5 | EP | Chlorophyta | Otu005 |
| Winter | VA12 | 1301VA12-51 | EP | Chlorophyta | Otu005 |
| Winter | VA12 | 1301VA12-55 | EP | Chlorophyta | Otu005 |
| Winter | VA12 | 1301VA12-66 | EP | Chlorophyta | Otu005 |
| Winter | VA12 | 1301VA12-72 | EP | Chlorophyta | Otu005 |
| Winter | VA12 | 1301VA12-75 | EP | Chlorophyta | Otu005 |
| Winter | VA12 | 1301VA12-78 | EP | Chlorophyta | Otu005 |
| Winter | VA12 | 1301VA12-82 | EP | Chlorophyta | Otu005 |
| Winter | VA12 | 1301VA12-83 | EP | Chlorophyta | Otu005 |
| Winter | VA12 | 1301VA12-86 | EP | Chlorophyta | Otu005 |
| Winter | VA12 | 1301VA12-91 | EP | Chlorophyta | Otu005 |
| Winter | VA12 | 1301VA12-96 | EP | Chlorophyta | Otu005 |
| Winter | VA13 | 1301VA13-28 | EP | Chlorophyta | Otu005 |
| Spring | VA11 | 1204VA11-49 | EP | Stramenopila | Otu006 |
| Spring | VA11 | 1204VA11-5 | EP | Stramenopila | Otu006 |
| Spring | VA11 | 1204VA11-79 | EP | Stramenopila | Otu006 |
| Spring | VA12 | 1204VA12-10 | EP | Stramenopila | Otu006 |
| Spring | VA12 | 1204VA12-24 | EP | Stramenopila | Otu006 |
| Spring | VA12 | 1204VA12-27 | EP | Stramenopila | Otu006 |
| Spring | VA12 | 1204VA12-31 | EP | Stramenopila | Otu006 |
| Spring | VA12 | 1204VA12-46 | EP | Stramenopila | Otu006 |
| Spring | VA12 | 1204VA12-53 | EP | Stramenopila | Otu006 |
| Spring | VA12 | 1204VA12-69 | EP | Stramenopila | Otu006 |
| Spring | VA12 | 1204VA12-75 | EP | Stramenopila | Otu006 |
| Spring | VA12 | 1204VA12-81 | EP | Stramenopila | Otu006 |
| Spring | VA12 | 1204VA12-87 | EP | Stramenopila | Otu006 |
| Fall | VA11 | 1210VA11-124 | EP | Stramenopila | Otu006 |
| Fall | VA11 | 1210VA11-132 | EP | Stramenopila | Otu006 |
| Fall | VA11 | 1210VA11-143 | EP | Stramenopila | Otu006 |
| Fall | VA11 | 1210VA11-158 | EP | Stramenopila | Otu006 |
| Fall | VA11 | 1210VA11-43 | EP | Stramenopila | Otu006 |
| Fall | VA11 | 1210VA11-56 | EP | Stramenopila | Otu006 |
| Fall | VA11 | 1210VA11-57 | EP | Stramenopila | Otu006 |
| Fall | VA11 | 1210VA11-75 | EP | Stramenopila | Otu006 |
| Fall | VA11 | 1210VA11-83 | EP | Stramenopila | Otu006 |
| Fall | VA11 | 1210VA11-89 | EP | Stramenopila | Otu006 |
| Fall | VA11 | 1210VA11-93 | EP | Stramenopila | Otu006 |
| Fall | VA11 | 1210VA11-95 | EP | Stramenopila | Otu006 |
| Winter | VA12 | 1301VA12-50 | EP | Stramenopila | Otu006 |
| Winter | VA12 | 1301VA12-84 | EP | Stramenopila | Otu006 |
| Winter | VA12 | 1301VA12-9 | EP | Stramenopila | Otu006 |
| Summer | VA11 | 1207VA11-107 | OB | UCB | Otu007 |
| Summer | VA11 | 1207VA11-15 | OB | UCB | Otu007 |
| Summer | VA11 | 1207VA11-22 | OB | UCB | Otu007 |
| Summer | VA11 | 1207VA11-28 | OB | UCB | Otu007 |
| Summer | VA11 | 1207VA11-32 | OB | UCB | Otu007 |
| Summer | VA11 | 1207VA11-4 | OB | UCB | Otu007 |
| Summer | VA11 | 1207VA11-40 | OB | UCB | Otu007 |
| Summer | VA11 | 1207VA11-44 | OB | UCB | Otu007 |
| Summer | VA11 | 1207VA11-48 | OB | UCB | Otu007 |
| Summer | VA11 | 1207VA11-5 | OB | UCB | Otu007 |
| Summer | VA11 | 1207VA11-54 | OB | UCB | Otu007 |
| Summer | VA11 | 1207VA11-59 | OB | UCB | Otu007 |
| Summer | VA11 | 1207VA11-61 | OB | UCB | Otu007 |
| Summer | VA11 | 1207VA11-68 | OB | UCB | Otu007 |
| Summer | VA11 | 1207VA11-86 | OB | UCB | Otu007 |
| Summer | VA11 | 1207VA11-88 | OB | UCB | Otu007 |
| Summer | VA11 | 1207VA11-92 | OB | UCB | Otu007 |
| Summer | VA11 | 1207VA11-96 | OB | UCB | Otu007 |
| Summer | VA11 | 1207VA11-96n | OB | UCB | Otu007 |
| Summer | VA12 | 1207VA12-126 | OB | UCB | Otu007 |
| Summer | VA12 | 1207VA12-44 | OB | UCB | Otu007 |
| Fall | VA11 | 1210VA11-16 | OB | UCB | Otu007 |
| Fall | VA11 | 1210VA11-160 | OB | UCB | Otu007 |
| Fall | VA11 | 1210VA11-19 | OB | UCB | Otu007 |
| Fall | VA11 | 1210VA11-22 | OB | UCB | Otu007 |
| Fall | VA11 | 1210VA11-41 | OB | UCB | Otu007 |
| Winter | VA11 | 1301VA11-125 | OB | UCB | Otu007 |
| Spring | VA11 | 1204VA11-10 | EP | Stramenopila | Otu008 |
| Spring | VA12 | 1204VA12-12 | EP | Stramenopila | Otu008 |
| Spring | VA12 | 1204VA12-14 | EP | Stramenopila | Otu008 |
| Spring | VA12 | 1204VA12-18 | EP | Stramenopila | Otu008 |
| Spring | VA12 | 1204VA12-28 | EP | Stramenopila | Otu008 |
| Spring | VA12 | 1204VA12-3 | EP | Stramenopila | Otu008 |
| Spring | VA12 | 1204VA12-36 | EP | Stramenopila | Otu008 |
| Spring | VA12 | 1204VA12-43 | EP | Stramenopila | Otu008 |
| Spring | VA12 | 1204VA12-45 | EP | Stramenopila | Otu008 |
| Spring | VA12 | 1204VA12-5 | EP | Stramenopila | Otu008 |
| Spring | VA12 | 1204VA12-54 | EP | Stramenopila | Otu008 |
| Spring | VA12 | 1204VA12-56 | EP | Stramenopila | Otu008 |
| Spring | VA12 | 1204VA12-59 | EP | Stramenopila | Otu008 |
| Spring | VA12 | 1204VA12-61 | EP | Stramenopila | Otu008 |
| Spring | VA12 | 1204VA12-62 | EP | Stramenopila | Otu008 |
| Spring | VA12 | 1204VA12-67 | EP | Stramenopila | Otu008 |
| Spring | VA12 | 1204VA12-70 | EP | Stramenopila | Otu008 |
| Spring | VA12 | 1204VA12-8 | EP | Stramenopila | Otu008 |
| Spring | VA12 | 1204VA12-89 | EP | Stramenopila | Otu008 |
| Spring | VA12 | 1204VA12-9 | EP | Stramenopila | Otu008 |
| Spring | VA12 | 1204VA12-90 | EP | Stramenopila | Otu008 |
| Spring | VA12 | 1204VA12-90n | EP | Stramenopila | Otu008 |
| Spring | VA12 | 1204VA12-96 | EP | Stramenopila | Otu008 |
| Spring | VA13 | 1204VA13-3n | EP | Stramenopila | Otu008 |
| Spring | VA13 | 1204VA13-6n | EP | Stramenopila | Otu008 |
| Spring | VA13 | 1204VA13-9n | EP | Stramenopila | Otu008 |
| Winter | VA13 | 1301VA13-100 | EP | Stramenopila | Otu009 |
| Winter | VA13 | 1301VA13-101 | EP | Stramenopila | Otu009 |
| Winter | VA13 | 1301VA13-102 | EP | Stramenopila | Otu009 |
| Winter | VA13 | 1301VA13-104 | EP | Stramenopila | Otu009 |
| Winter | VA13 | 1301VA13-2 | EP | Stramenopila | Otu009 |
| Winter | VA13 | 1301VA13-21 | EP | Stramenopila | Otu009 |
| Winter | VA13 | 1301VA13-29 | EP | Stramenopila | Otu009 |
| Winter | VA13 | 1301VA13-3 | EP | Stramenopila | Otu009 |
| Winter | VA13 | 1301VA13-39 | EP | Stramenopila | Otu009 |
| Winter | VA13 | 1301VA13-43 | EP | Stramenopila | Otu009 |
| Winter | VA13 | 1301VA13-6 | EP | Stramenopila | Otu009 |
| Winter | VA13 | 1301VA13-63 | EP | Stramenopila | Otu009 |
| Winter | VA13 | 1301VA13-68 | EP | Stramenopila | Otu009 |
| Winter | VA13 | 1301VA13-7 | EP | Stramenopila | Otu009 |
| Winter | VA13 | 1301VA13-79 | EP | Stramenopila | Otu009 |
| Winter | VA13 | 1301VA13-86n | EP | Stramenopila | Otu009 |
| Winter | VA13 | 1301VA13-87 | EP | Stramenopila | Otu009 |
| Winter | VA13 | 1301VA13-88 | EP | Stramenopila | Otu009 |
| Winter | VA13 | 1301VA13-91 | EP | Stramenopila | Otu009 |
| Winter | VA13 | 1301VA13-93 | EP | Stramenopila | Otu009 |
| Winter | VA13 | 1301VA13-93n | EP | Stramenopila | Otu009 |
| Winter | VA13 | 1301VA13-94 | EP | Stramenopila | Otu009 |
| Spring | VA10 | 1204VA10-100 | CYA | Pseudanabaena | Otu010 |
| Spring | VA10 | 1204VA10-12 | CYA | Pseudanabaena | Otu010 |
| Spring | VA10 | 1204VA10-94 | CYA | Pseudanabaena | Otu010 |
| Spring | VA11 | 1204VA11-15 | CYA | Pseudanabaena | Otu010 |
| Spring | VA11 | 1204VA11-28 | CYA | Pseudanabaena | Otu010 |
| Spring | VA11 | 1204VA11-31 | CYA | Pseudanabaena | Otu010 |
| Spring | VA11 | 1204VA11-32 | CYA | Pseudanabaena | Otu010 |
| Spring | VA11 | 1204VA11-35 | CYA | Pseudanabaena | Otu010 |
| Spring | VA11 | 1204VA11-37 | CYA | Pseudanabaena | Otu010 |
| Spring | VA11 | 1204VA11-38 | CYA | Pseudanabaena | Otu010 |
| Spring | VA11 | 1204VA11-3n | CYA | Pseudanabaena | Otu010 |
| Spring | VA11 | 1204VA11-51 | CYA | Pseudanabaena | Otu010 |
| Spring | VA11 | 1204VA11-52 | CYA | Pseudanabaena | Otu010 |
| Spring | VA11 | 1204VA11-53 | CYA | Pseudanabaena | Otu010 |
| Spring | VA11 | 1204VA11-70 | CYA | Pseudanabaena | Otu010 |
| Spring | VA11 | 1204VA11-78 | CYA | Pseudanabaena | Otu010 |
| Spring | VA11 | 1204VA11-9 | CYA | Pseudanabaena | Otu010 |
| Winter | VA10 | 1301VA10-165 | CYA | Pseudanabaena | Otu010 |
| Winter | VA10 | 1301VA10-20 | CYA | Pseudanabaena | Otu010 |
| Spring | VA11 | 1204VA11-57 | EP | Stramenopila | Otu011 |
| Spring | VA11 | 1204VA11-66 | EP | Stramenopila | Otu011 |
| Spring | VA11 | 1204VA11-93 | EP | Stramenopila | Otu011 |
| Spring | VA12 | 1204VA12-1 | EP | Stramenopila | Otu011 |
| Spring | VA12 | 1204VA12-13 | EP | Stramenopila | Otu011 |
| Spring | VA12 | 1204VA12-15 | EP | Stramenopila | Otu011 |
| Spring | VA12 | 1204VA12-16 | EP | Stramenopila | Otu011 |
| Spring | VA12 | 1204VA12-17 | EP | Stramenopila | Otu011 |
| Spring | VA12 | 1204VA12-19 | EP | Stramenopila | Otu011 |
| Spring | VA12 | 1204VA12-20 | EP | Stramenopila | Otu011 |
| Spring | VA12 | 1204VA12-26 | EP | Stramenopila | Otu011 |
| Spring | VA12 | 1204VA12-30 | EP | Stramenopila | Otu011 |
| Spring | VA12 | 1204VA12-64 | EP | Stramenopila | Otu011 |
| Spring | VA12 | 1204VA12-72 | EP | Stramenopila | Otu011 |
| Spring | VA12 | 1204VA12-73 | EP | Stramenopila | Otu011 |
| Spring | VA12 | 1204VA12-92 | EP | Stramenopila | Otu011 |
| Winter | VA12 | 1301VA12-92 | EP | Stramenopila | Otu011 |
| Summer | VA12 | 1207VA12-13 | CYA | Cyanobacteria | Otu012 |
| Summer | VA12 | 1207VA12-18 | CYA | Cyanobacteria | Otu012 |
| Summer | VA12 | 1207VA12-25 | CYA | Cyanobacteria | Otu012 |
| Summer | VA12 | 1207VA12-28 | CYA | Cyanobacteria | Otu012 |
| Summer | VA12 | 1207VA12-31 | CYA | Cyanobacteria | Otu012 |
| Summer | VA12 | 1207VA12-7 | CYA | Cyanobacteria | Otu012 |
| Summer | VA12 | 1207VA12-89 | CYA | Cyanobacteria | Otu012 |
| Summer | VA12 | 1207VA12-92 | CYA | Cyanobacteria | Otu012 |
| Summer | VA13 | 1207VA13-14 | CYA | Cyanobacteria | Otu012 |
| Summer | VA13 | 1207VA13-15 | CYA | Cyanobacteria | Otu012 |
| Summer | VA13 | 1207VA13-22 | CYA | Cyanobacteria | Otu012 |
| Summer | VA13 | 1207VA13-27 | CYA | Cyanobacteria | Otu012 |
| Summer | VA13 | 1207VA13-32 | CYA | Cyanobacteria | Otu012 |
| Summer | VA13 | 1207VA13-7 | CYA | Cyanobacteria | Otu012 |
| Summer | VA13 | 1207VA13-73 | CYA | Cyanobacteria | Otu012 |
| Summer | VA13 | 1207VA13-75 | CYA | Cyanobacteria | Otu012 |
| Fall | VA11 | 1210VA11-27 | CYA | Cyanobacteria | Otu012 |
| Spring | VA11 | 1204VA11-17n | EP | Stramenopila | Otu013 |
| Spring | VA11 | 1204VA11-33 | EP | Stramenopila | Otu013 |
| Spring | VA12 | 1204VA12-32 | EP | Stramenopila | Otu013 |
| Spring | VA12 | 1204VA12-34 | EP | Stramenopila | Otu013 |
| Spring | VA12 | 1204VA12-49 | EP | Stramenopila | Otu013 |
| Spring | VA12 | 1204VA12-55 | EP | Stramenopila | Otu013 |
| Spring | VA12 | 1204VA12-60 | EP | Stramenopila | Otu013 |
| Fall | VA11 | 1210VA11-107 | EP | Stramenopila | Otu013 |
| Fall | VA11 | 1210VA11-154 | EP | Stramenopila | Otu013 |
| Fall | VA11 | 1210VA11-24 | EP | Stramenopila | Otu013 |
| Fall | VA11 | 1210VA11-48 | EP | Stramenopila | Otu013 |
| Fall | VA11 | 1210VA11-7 | EP | Stramenopila | Otu013 |
| Fall | VA11 | 1210VA11-72 | EP | Stramenopila | Otu013 |
| Fall | VA11 | 1210VA11-82 | EP | Stramenopila | Otu013 |
| Fall | VA12 | 1210VA12-37 | EP | Stramenopila | Otu013 |
| Winter | VA11 | 1301VA11-58 | EP | Stramenopila | Otu013 |
| Winter | VA12 | 1301VA12-65 | EP | Stramenopila | Otu013 |
| Winter | VA11 | 1301VA11-12 | EP | Stramenopila | Otu014 |
| Winter | VA11 | 1301VA11-121 | EP | Stramenopila | Otu014 |
| Winter | VA11 | 1301VA11-133 | EP | Stramenopila | Otu014 |
| Winter | VA11 | 1301VA11-134 | EP | Stramenopila | Otu014 |
| Winter | VA11 | 1301VA11-141 | EP | Stramenopila | Otu014 |
| Winter | VA11 | 1301VA11-152 | EP | Stramenopila | Otu014 |
| Winter | VA11 | 1301VA11-158 | EP | Stramenopila | Otu014 |
| Winter | VA11 | 1301VA11-17 | EP | Stramenopila | Otu014 |
| Winter | VA11 | 1301VA11-173 | EP | Stramenopila | Otu014 |
| Winter | VA11 | 1301VA11-22 | EP | Stramenopila | Otu014 |
| Winter | VA11 | 1301VA11-48 | EP | Stramenopila | Otu014 |
| Winter | VA11 | 1301VA11-61 | EP | Stramenopila | Otu014 |
| Winter | VA11 | 1301VA11-75 | EP | Stramenopila | Otu014 |
| Winter | VA11 | 1301VA11-8 | EP | Stramenopila | Otu014 |
| Winter | VA11 | 1301VA11-90 | EP | Stramenopila | Otu014 |
| Spring | VA10 | 1204VA10-24n | OB | UCB | Otu015 |
| Spring | VA10 | 1204VA10-27 | OB | UCB | Otu015 |
| Spring | VA10 | 1204VA10-39n | OB | UCB | Otu015 |
| Spring | VA10 | 1204VA10-54 | OB | UCB | Otu015 |
| Spring | VA10 | 1204VA10-65 | OB | UCB | Otu015 |
| Spring | VA10 | 1204VA10-73 | OB | UCB | Otu015 |
| Summer | VA10 | 1207VA10-32 | OB | UCB | Otu015 |
| Summer | VA10 | 1207VA10-5 | OB | UCB | Otu015 |
| Summer | VA10 | 1207VA10-5n | OB | UCB | Otu015 |
| Fall | VA10 | 1210VA10-75 | OB | UCB | Otu015 |
| Fall | VA10 | 1210VA10-94 | OB | UCB | Otu015 |
| Winter | VA10 | 1301VA10-150 | OB | UCB | Otu015 |
| Winter | VA10 | 1301VA10-98n | OB | UCB | Otu015 |
| Spring | VA11 | 1204VA11-11 | EP | Stramenopila | Otu016 |
| Spring | VA11 | 1204VA11-1n | EP | Stramenopila | Otu016 |
| Spring | VA11 | 1204VA11-39 | EP | Stramenopila | Otu016 |
| Spring | VA11 | 1204VA11-45 | EP | Stramenopila | Otu016 |
| Spring | VA12 | 1204VA12-63 | EP | Stramenopila | Otu016 |
| Spring | VA12 | 1204VA12-94 | EP | Stramenopila | Otu016 |
| Fall | VA11 | 1210VA11-58 | EP | Stramenopila | Otu016 |
| Fall | VA11 | 1210VA11-64 | EP | Stramenopila | Otu016 |
| Fall | VA12 | 1210VA12-62 | EP | Stramenopila | Otu016 |
| Winter | VA11 | 1301VA11-119 | EP | Stramenopila | Otu016 |
| Spring | VA10 | 1204VA10-31 | OB | UCB | Otu017 |
| Summer | VA10 | 1207VA10-71 | OB | UCB | Otu017 |
| Summer | VA10 | 1207VA10-86 | OB | UCB | Otu017 |
| Summer | VA10 | 1207VA10-98n | OB | UCB | Otu017 |
| Summer | VA12 | 1207VA12-86 | OB | UCB | Otu017 |
| Fall | VA10 | 1210VA10-51 | OB | UCB | Otu017 |
| Fall | VA10 | 1210VA10-85 | OB | UCB | Otu017 |
| Winter | VA10 | 1301VA10-114 | OB | UCB | Otu017 |
| Winter | VA10 | 1301VA10-127 | OB | UCB | Otu017 |
| Winter | VA11 | 1301VA11-100 | EP | Stramenopila | Otu018 |
| Winter | VA11 | 1301VA11-113 | EP | Stramenopila | Otu018 |
| Winter | VA11 | 1301VA11-169 | EP | Stramenopila | Otu018 |
| Winter | VA11 | 1301VA11-21 | EP | Stramenopila | Otu018 |
| Winter | VA11 | 1301VA11-24 | EP | Stramenopila | Otu018 |
| Winter | VA11 | 1301VA11-39 | EP | Stramenopila | Otu018 |
| Winter | VA11 | 1301VA11-54 | EP | Stramenopila | Otu018 |
| Summer | VA11 | 1207VA11-13 | OB | Candidate | Otu019 |
| Summer | VA11 | 1207VA11-16 | OB | Candidate | Otu019 |
| Summer | VA11 | 1207VA11-23 | OB | Candidate | Otu019 |
| Summer | VA11 | 1207VA11-26 | OB | Candidate | Otu019 |
| Summer | VA11 | 1207VA11-51 | OB | Candidate | Otu019 |
| Summer | VA11 | 1207VA11-57 | OB | Candidate | Otu019 |
| Summer | VA11 | 1207VA11-71 | OB | Candidate | Otu019 |
| Summer | VA10 | 1207VA10-105 | OB | UCB | Otu020 |
| Summer | VA10 | 1207VA10-16 | OB | UCB | Otu021 |
| Spring | VA11 | 1204VA11-41 | EP | Chlorophyta | Otu021 |
| Spring | VA12 | 1204VA12-25 | EP | Chlorophyta | Otu021 |
| Spring | VA12 | 1204VA12-37 | EP | Chlorophyta | Otu021 |
| Spring | VA12 | 1204VA12-84 | EP | Chlorophyta | Otu021 |
| Spring | VA12 | 1204VA12-93 | EP | Chlorophyta | Otu021 |
| Spring | VA13 | 1204VA13-19n | EP | Chlorophyta | Otu021 |
| Fall | VA11 | 1210VA11-4 | EP | Chlorophyta | Otu021 |
| Summer | VA10 | 1207VA10-27 | OB | UCB | Otu022 |
| Spring | VA10 | 1204VA10-31n | OB | UCB | Otu022 |
| Spring | VA10 | 1204VA10-55 | OB | UCB | Otu022 |
| Spring | VA10 | 1204VA10-83 | OB | UCB | Otu022 |
| Winter | VA10 | 1301VA10-155 | OB | UCB | Otu022 |
| Winter | VA10 | 1301VA10-18 | OB | UCB | Otu022 |
| Winter | VA10 | 1301VA10-38 | OB | UCB | Otu022 |
| Summer | VA10 | 1207VA10-3 | OB | UCB | Otu023 |
| Spring | VA11 | 1204VA11-62 | OB | UCB | Otu023 |
| Spring | VA12 | 1204VA12-57n | OB | UCB | Otu023 |
| Spring | VA12 | 1204VA12-66 | OB | UCB | Otu023 |
| Spring | VA12 | 1204VA12-86 | OB | UCB | Otu023 |
| Spring | VA12 | 1204VA12-88 | OB | UCB | Otu023 |
| Summer | VA11 | 1207VA11-106 | OB | UCB | Otu023 |
| Summer | VA12 | 1207VA12-112 | OB | UCB | Otu024 |
| Summer | VA11 | 1207VA11-25 | OB | UCB | Otu024 |
| Summer | VA11 | 1207VA11-30 | OB | UCB | Otu024 |
| Summer | VA11 | 1207VA11-97 | OB | UCB | Otu024 |
| Summer | VA11 | 1207VA11-97n | OB | UCB | Otu024 |
| Summer | VA12 | 1207VA12-35 | OB | UCB | Otu024 |
| Fall | VA10 | 1210VA10-145 | OB | UCB | Otu025 |
| Spring | VA12 | 1204VA12-79 | EP | Chlorophyta | Otu025 |
| Winter | VA13 | 1301VA13-19 | EP | Chlorophyta | Otu025 |
| Winter | VA13 | 1301VA13-57 | EP | Chlorophyta | Otu025 |
| Winter | VA13 | 1301VA13-76 | EP | Chlorophyta | Otu025 |
| Winter | VA13 | 1301VA13-98 | EP | Chlorophyta | Otu025 |
| Winter | VA10 | 1301VA10-96 | OB | UCB | Otu026 |
| Spring | VA10 | 1204VA10-97 | EP | Stramenopila | Otu026 |
| Summer | VA10 | 1207VA10-77 | EP | Stramenopila | Otu026 |
| Winter | VA10 | 1301VA10-52 | EP | Stramenopila | Otu026 |
| Winter | VA11 | 1301VA11-115 | EP | Stramenopila | Otu026 |
| Winter | VA11 | 1301VA11-15 | EP | Stramenopila | Otu026 |
| Spring | VA11 | 1204VA11-54 | EP | Chlorophyta | Otu027 |
| Spring | VA11 | 1204VA11-68 | EP | Chlorophyta | Otu027 |
| Fall | VA11 | 1210VA11-147 | EP | Chlorophyta | Otu027 |
| Winter | VA11 | 1301VA11-47 | EP | Chlorophyta | Otu027 |
| Winter | VA11 | 1301VA11-5 | EP | Chlorophyta | Otu027 |
| Spring | VA10 | 1204VA10-41 | OB | UCB | Otu028 |
| Summer | VA10 | 1207VA10-22 | OB | UCB | Otu028 |
| Summer | VA10 | 1207VA10-24 | OB | UCB | Otu028 |
| Fall | VA10 | 1210VA10-157 | OB | UCB | Otu028 |
| Winter | VA10 | 1301VA10-76 | OB | UCB | Otu028 |
| Summer | VA11 | 1207VA11-63 | OB | Candidate | Otu029 |
| Fall | VA11 | 1210VA11-144 | OB | Candidate | Otu029 |
| Fall | VA11 | 1210VA11-23 | OB | Candidate | Otu029 |
| Winter | VA10 | 1301VA10-178 | OB | Candidate | Otu029 |
| Spring | VA10 | 1204VA10-93n | OB | UCB | Otu030 |
| Fall | VA10 | 1210VA10-34 | OB | UCB | Otu030 |
| Fall | VA10 | 1210VA10-35 | OB | UCB | Otu030 |
| Fall | VA10 | 1210VA10-67 | OB | UCB | Otu030 |
| Fall | VA10 | 1210VA10-19 | OB | UCB | Otu031 |
| Fall | VA10 | 1210VA10-22 | OB | UCB | Otu032 |
| Summer | VA11 | 1207VA11-98 | OB | UCB | otu032 |
| Fall | VA11 | 1210VA11-102 | OB | UCB | otu032 |
| Fall | VA11 | 1210VA11-122 | OB | UCB | otu032 |
| Winter | VA12 | 1301VA12-73 | OB | UCB | otu032 |
| Fall | VA10 | 1210VA10-42 | OB | UCB | Otu033 |
| Summer | VA11 | 1207VA11-12 | OB | Candidate | otu033 |
| Summer | VA11 | 1207VA11-58 | OB | Candidate | otu033 |
| Summer | VA11 | 1207VA11-94 | OB | Candidate | otu033 |
| Summer | VA12 | 1207VA12-87 | OB | Candidate | otu033 |
| Winter | VA10 | 1301VA10-123 | OB | UCB | Otu034 |
| Spring | VA11 | 1204VA11-87n | EP | Chlorophyta | otu034 |
| Spring | VA12 | 1204VA12-57 | EP | Chlorophyta | otu034 |
| Spring | VA12 | 1204VA12-85 | EP | Chlorophyta | otu034 |
| Fall | VA11 | 1210VA11-148 | EP | Chlorophyta | otu034 |
| Summer | VA11 | 1207VA11-18 | OB | UCB | otu035 |
| Summer | VA11 | 1207VA11-49 | OB | UCB | otu035 |
| Summer | VA11 | 1207VA11-50 | OB | UCB | otu035 |
| Summer | VA11 | 1207VA11-69 | OB | UCB | otu035 |
| Spring | VA12 | 1204VA12-12n | EP | UCE | otu036 |
| Spring | VA12 | 1204VA12-2 | EP | UCE | otu036 |
| Spring | VA13 | 1204VA13-62 | EP | UCE | otu036 |
| Spring | VA10 | 1204VA10-23 | EP | Chlorophyta | otu037 |
| Spring | VA10 | 1204VA10-34 | EP | Chlorophyta | otu037 |
| Spring | VA10 | 1204VA10-87 | EP | Chlorophyta | otu037 |
| Summer | VA11 | 1207VA11-74 | OB | Candidate | otu038 |
| Fall | VA11 | 1210VA11-104 | OB | Candidate | otu038 |
| Fall | VA11 | 1210VA11-119 | OB | Candidate | otu038 |
| Summer | VA11 | 1207VA11-70 | OB | UCB | otu039 |
| Fall | VA11 | 1210VA11-1 | OB | UCB | otu039 |
| Fall | VA11 | 1210VA11-30 | OB | UCB | otu039 |
| Winter | VA11 | 1301VA11-122 | EP | Chlorophyta | otu040 |
| Winter | VA11 | 1301VA11-143 | EP | Chlorophyta | otu040 |
| Winter | VA11 | 1301VA11-1n | EP | Chlorophyta | otu040 |
| Spring | VA10 | 1204VA10-14 | OB | UCB | otu041 |
| Spring | VA10 | 1204VA10-33 | OB | UCB | otu041 |
| Spring | VA10 | 1204VA10-95 | OB | UCB | otu041 |
| Spring | VA10 | 1204VA10-68 | OB | UCB | otu042 |
| Summer | VA12 | 1207VA12-117 | OB | UCB | otu042 |
| Summer | VA12 | 1207VA12-53 | OB | UCB | otu042 |
| Spring | VA11 | 1204VA11-71 | OB | Candidate | otu043 |
| Summer | VA11 | 1207VA11-38 | OB | Candidate | otu043 |
| Winter | VA10 | 1301VA10-53 | OB | Candidate | otu043 |
| Summer | VA11 | 1207VA11-2 | OB | UCB | otu044 |
| Summer | VA11 | 1207VA11-27 | OB | UCB | otu044 |
| Summer | VA11 | 1207VA11-3 | OB | UCB | otu044 |
| Summer | VA10 | 1207VA10-26 | OB | UCB | otu045 |
| Summer | VA10 | 1207VA10-31 | OB | UCB | otu045 |
| Summer | VA10 | 1207VA10-33 | OB | UCB | otu045 |
| Spring | VA10 | 1204VA10-101 | OB | UCB | otu046 |
| Summer | VA12 | 1207VA12-106 | OB | UCB | otu046 |
| Fall | VA10 | 1210VA10-43 | OB | UCB | otu046 |
| Winter | VA12 | 1301VA12-57 | EP | Chlorophyta | otu047 |
| Winter | VA13 | 1301VA13-56 | EP | Chlorophyta | otu047 |
| Winter | VA13 | 1301VA13-80 | EP | Chlorophyta | otu047 |
| Spring | VA13 | 1204VA13-35 | OB | UCB | otu048 |
| Spring | VA13 | 1204VA13-73 | OB | UCB | otu048 |
| Spring | VA13 | 1204VA13-89 | OB | UCB | otu048 |
| Spring | VA11 | 1204VA11-91 | OB | Candidate | otu049 |
| Summer | VA12 | 1207VA12-47 | OB | Candidate | otu049 |
| Summer | VA10 | 1207VA10-73 | OB | UCB | otu050 |
| Summer | VA10 | 1207VA10-83 | OB | UCB | otu050 |
| Summer | VA10 | 1207VA10-117 | OB | UCB | otu051 |
| Summer | VA12 | 1207VA12-51 | OB | UCB | otu051 |
| Winter | VA12 | 1301VA12-106 | EP | Chlorophyta | otu052 |
| Winter | VA12 | 1301VA12-43 | EP | Chlorophyta | otu052 |
| Fall | VA10 | 1210VA10-154 | CYA | ML635J-22 | Otu053 |
| Winter | VA10 | 1301VA10-65 | CYA | ML635J-21 | Otu053 |
| Winter | VA13 | 1301VA13-37 | EP | UCE | Otu054 |
| Winter | VA13 | 1301VA13-85n | EP | UCE | Otu054 |
| Summer | VA10 | 1207VA10-28 | OB | Candidate | Otu055 |
| Fall | VA10 | 1210VA10-78 | OB | Candidate | Otu055 |
| Winter | VA11 | 1301VA11-55 | EP | Stramenopila | Otu056 |
| Winter | VA11 | 1301VA11-77 | EP | Stramenopila | Otu056 |
| Spring | VA11 | 1204VA11-1 | CYA | Arthronema | Otu057 |
| Spring | VA11 | 1204VA11-50 | CYA | Arthronema | Otu057 |
| Spring | VA12 | 1204VA12-74 | EP | Stramenopila | Otu058 |
| Spring | VA13 | 1204VA13-96n | EP | Stramenopila | Otu058 |
| Summer | VA10 | 1207VA10-104 | OB | Candidate | Otu059 |
| Fall | VA10 | 1210VA10-167 | OB | Candidate | Otu059 |
| Winter | VA11 | 1301VA11-2 | EP | Chlorophyta | Otu060 |
| Winter | VA11 | 1301VA11-3 | EP | Chlorophyta | Otu060 |
| Winter | VA11 | 1301VA11-160 | EP | Stramenopila | Otu061 |
| Winter | VA11 | 1301VA11-172 | EP | Stramenopila | Otu061 |
| Winter | VA11 | 1301VA11-145 | OB | UCB | Otu062 |
| Winter | VA11 | 1301VA11-154 | OB | UCB | Otu062 |
| Summer | VA10 | 1207VA10-99 | OB | Candidate | Otu063 |
| Fall | VA10 | 1210VA10-72 | OB | Candidate | Otu063 |
| Winter | VA11 | 1301VA11-1 | EP | Chlorophyta | Otu064 |
| Winter | VA12 | 1301VA12-110 | EP | Chlorophyta | Otu064 |
| Winter | VA11 | 1301VA11-136 | EP | Stramenopila | Otu065 |
| Winter | VA11 | 1301VA11-80 | EP | Stramenopila | Otu065 |
| Winter | VA11 | 1301VA11-13 | EP | Stramenopila | Otu066 |
| Winter | VA11 | 1301VA11-42 | EP | Stramenopila | Otu066 |
| Summer | VA13 | 1207VA13-16 | CYA | Anabaena | Otu067 |
| Summer | VA13 | 1207VA13-30 | CYA | Anabaena | Otu067 |
| Spring | VA10 | 1204VA10-91 | EP | Streptophyta | Otu068 |
| Spring | VA13 | 1204VA13-61 | EP | Streptophyta | Otu068 |
| Winter | VA11 | 1301VA11-103 | EP | Stramenopila | Otu069 |
| Winter | VA11 | 1301VA11-120 | EP | Stramenopila | Otu069 |
| Summer | VA12 | 1207VA12-10 | EP | Cryptophyta | otu070 |
| Summer | VA13 | 1207VA13-8 | EP | Cryptophyta | otu070 |
| Winter | VA10 | 1301VA10-173 | OB | UCB | otu071 |
| Winter | VA10 | 1301VA10-56 | OB | UCB | Otu071 |
| Spring | VA11 | 1204VA11-75 | CYA | Microcoleus | Otu072 |
| Winter | VA10 | 1301VA10-50 | CYA | Microcoleus | Otu072 |
| Spring | VA11 | 1204VA11-64 | CYA | Leptolyngbya | Otu073 |
| Spring | VA11 | 1204VA11-7 | CYA | Leptolyngbya | Otu073 |
| Summer | VA10 | 1207VA10-111 | OB | UCB | Otu074 |
| Summer | VA10 | 1207VA10-36 | OB | UCB | Otu074 |
| Summer | VA10 | 1207VA10-112 | EP | Cryptophyta | Otu075 |
| Summer | VA10 | 1207VA10-54 | EP | Cryptophyta | Otu075 |
| Spring | VA11 | 1204VA11-59 | EP | Chlorophyta | Otu076 |
| Winter | VA11 | 1301VA11-72 | EP | Chlorophyta | Otu076 |
| Spring | VA11 | 1204VA11-55 | EP | Chlorophyta | Otu077 |
| Spring | VA11 | 1204VA11-94 | EP | Chlorophyta | Otu077 |
| Spring | VA11 | 1204VA11-46 | CYA | Cyanobacteria | Otu078 |
| Winter | VA11 | 1301VA11-185 | CYA | Cyanobacteria | Otu078 |
| Summer | VA10 | 1207VA10-108 | OB | UCB | Otu079 |
| Summer | VA10 | 1207VA10-109 | OB | UCB | Otu079 |
| Summer | VA10 | 1207VA10-17 | OB | UCB | Otu080 |
| Summer | VA10 | 1207VA10-25 | OB | UCB | Otu080 |
| Spring | VA11 | 1204VA11-25 | OB | UCB | Otu081 |
| Spring | VA11 | 1204VA11-30n | OB | UCB | Otu081 |
| Spring | VA11 | 1204VA11-23 | EP | UCE | Otu082 |
| Spring | VA11 | 1204VA11-72 | EP | UCE | Otu082 |
| Spring | VA11 | 1204VA11-21n | CYA | Phormidium | Otu083 |
| Spring | VA11 | 1204VA11-82 | CYA | Phormidium | Otu083 |
| Spring | VA11 | 1204VA11-21 | CYA | MLE1-13 | Otu084 |
| Winter | VA10 | 1301VA10-166 | CYA | MLE1-12 | Otu084 |
| Summer | VA10 | 1207VA10-106 | OB | UCB | Otu085 |
| Summer | VA10 | 1207VA10-91 | OB | UCB | Otu085 |
| Spring | VA11 | 1204VA11-14 | CYA | Leptolyngbya | Otu086 |
| Spring | VA11 | 1204VA11-58 | CYA | Leptolyngbya | Otu086 |
| Spring | VA11 | 1204VA11-12 | CYA | Cyanobacteria | Otu087 |
| Spring | VA11 | 1204VA11-86 | CYA | Cyanobacteria | Otu087 |
| Spring | VA10 | 1204VA10-108 | CYA | UCC | Otu088 |
| Summer | VA12 | 1207VA12-69 | CYA | UCC | Otu088 |
| Summer | VA10 | 1207VA10-118 | CYA | MLE1-13 | Otu089 |
| Summer | VA10 | 1207VA10-67 | CYA | MLE1-12 | Otu089 |
| Spring | VA10 | 1204VA10-99 | OB | Candidate | Otu090 |
| Summer | VA10 | 1207VA10-107 | OB | Candidate | Otu090 |
| Summer | VA10 | 1207VA10-102n | OB | Candidate | Otu091 |
| Summer | VA10 | 1207VA10-41 | OB | Candidate | Otu091 |
| Spring | VA11 | 1204VA11-90 | CYA | Leptolyngbya | Otu092 |
| Fall | VA11 | 1210VA11-98 | CYA | Leptolyngbya | Otu092 |
| Summer | VA11 | 1207VA11-81 | OB | Candidate | Otu093 |
| Summer | VA11 | 1207VA11-83 | OB | Candidate | Otu093 |
| Summer | VA11 | 1207VA11-39 | OB | UCB | Otu094 |
| Summer | VA11 | 1207VA11-6 | OB | UCB | Otu094 |
| Summer | VA12 | 1207VA12-66 | OB | UCB | Otu095 |
| Fall | VA13 | 1210VA13-0 | OB | UCB | Otu095 |
| Summer | VA11 | 1207VA11-36 | OB | UCB | Otu096 |
| Summer | VA11 | 1207VA11-47 | OB | UCB | Otu096 |
| Spring | VA10 | 1204VA10-105 | OB | Candidate | Otu097 |
| Winter | VA10 | 1301VA10-115 | OB | Candidate | Otu097 |
| Summer | VA11 | 1207VA11-77 | OB | Candidate | Otu098 |
| Winter | VA10 | 1301VA10-1 | OB | Candidate | Otu098 |
| Summer | VA11 | 1207VA11-60 | OB | Candidate | Otu099 |
| Fall | VA11 | 1210VA11-130 | OB | Candidate | Otu099 |
| Summer | VA11 | 1207VA11-11 | CYA | Limnothrix | Otu100 |
| Summer | VA11 | 1207VA11-45 | CYA | Limnothrix | Otu100 |
| Summer | VA12 | 1207VA12-49 | OB | Candidate | otu101 |
| Summer | VA12 | 1207VA12-73 | OB | Candidate | otu101 |
| Summer | VA12 | 1207VA12-8 | EP | Cryptophyta | otu102 |
| Winter | VA10 | 1301VA10-19 | EP | Cryptophyta | otu102 |
| Winter | VA13 | 1301VA13-23 | EP | Chlorophyta | otu103 |
| Winter | VA13 | 1301VA13-62 | EP | Chlorophyta | otu103 |
| Fall | VA11 | 1210VA11-113 | OB | Candidate | Otu104 |
| Winter | VA10 | 1301VA10-28 | OB | Candidate | Otu104 |
| Fall | VA11 | 1210VA11-136 | OB | UCB | Otu105 |
| Fall | VA11 | 1210VA11-18 | OB | UCB | Otu105 |
| Fall | VA10 | 1210VA10-123 | OB | UCB | Otu106 |
| Fall | VA10 | 1210VA10-36 | OB | UCB | Otu106 |
| Summer | VA10 | 1207VA10-79 | OB | UCB | Otu107 |
| Fall | VA11 | 1210VA11-105 | OB | UCB | Otu107 |
| Summer | VA11 | 1207VA11-87 | OB | UCB | Otu108 |
| Fall | VA11 | 1210VA11-52 | OB | UCB | Otu108 |
| Summer | VA12 | 1207VA12-30 | EP | Stramenopila | Otu109 |
| Fall | VA11 | 1210VA11-54 | EP | Stramenopila | Otu109 |
| Fall | VA11 | 1210VA11-92 | EP | Stramenopila | Otu110 |
| Winter | VA11 | 1301VA11-192 | EP | Stramenopila | Otu110 |
| Fall | VA10 | 1210VA10-44 | CYA | MLE1-12 | Otu111 |
| Fall | VA11 | 1210VA11-86 | CYA | MLE1-12 | Otu111 |
| Summer | VA10 | 1207VA10-52 | OB | Candidate | Otu112 |
| Fall | VA11 | 1210VA11-15 | OB | Candidate | Otu112 |
| Winter | VA10 | 1301VA10-57 | CYA | UCC | Otu113 |
| Winter | VA10 | 1301VA10-57n | CYA | UCC | Otu113 |
| Winter | VA10 | 1301VA10-174 | CYA | MLE1-12 | Otu114 |
| Winter | VA10 | 1301VA10-180 | CYA | MLE1-12 | Otu114 |
| Spring | VA13 | 1204VA13-21n | EP | Stramenopila | Otu115 |
| Fall | VA11 | 1210VA11-65 | EP | Stramenopila | Otu115 |
| Fall | VA12 | 1210VA12-55 | CYA | Microcystis | Otu116 |
| Fall | VA13 | 1210VA13-51 | CYA | Microcystis | Otu116 |
| Fall | VA10 | 1210VA10-146 | OB | UCB | Otu117 |
| Winter | VA10 | 1301VA10-137 | OB | UCB | Otu117 |
| Winter | VA10 | 1301VA10-181 | EP | Stramenopila | Otu118 |
| Winter | VA11 | 1301VA11-99 | EP | Stramenopila | Otu118 |
| Summer | VA10 | 1207VA10-1 | OB | UCB | Otu119 |
| Summer | VA10 | 1207VA10-100n | EP | Chlorophyta | Otu120 |
| Summer | VA10 | 1207VA10-18 | OB | UCB | Otu121 |
| Summer | VA10 | 1207VA10-100 | OB | UCB | Otu122 |
| Summer | VA10 | 1207VA10-10 | OB | UCB | Otu123 |
| Summer | VA10 | 1207VA10-101n | OB | UCB | Otu124 |
| Summer | VA10 | 1207VA10-19 | OB | UCB | Otu125 |
| Fall | VA11 | 1210VA11-36 | OB | UCB | Otu126 |
| Fall | VA11 | 1210VA11-38 | OB | UCB | Otu127 |
| Fall | VA11 | 1210VA11-39 | OB | UCB | Otu128 |
| Fall | VA11 | 1210VA11-40 | OB | UCB | Otu129 |
| Summer | VA11 | 1207VA11-98n | OB | UCB | Otu130 |
| Summer | VA11 | 1207VA11-95 | OB | Candidate | Otu131 |
| Summer | VA10 | 1207VA10-2 | OB | Candidate | Otu132 |
| Summer | VA10 | 1207VA10-110 | OB | UCB | Otu133 |
| Summer | VA10 | 1207VA10-120 | OB | UCB | Otu134 |
| Summer | VA10 | 1207VA10-119 | OB | UCB | Otu135 |
| Fall | VA11 | 1210VA11-29 | OB | UCB | Otu136 |
| Summer | VA10 | 1207VA10-116 | OB | UCB | Otu137 |
| Summer | VA10 | 1207VA10-115 | OB | UCB | Otu138 |
| Summer | VA10 | 1207VA10-114 | OB | UCB | Otu139 |
| Summer | VA10 | 1207VA10-113 | OB | UCB | Otu140 |
| Summer | VA10 | 1207VA10-101 | OB | UCB | Otu141 |
| Fall | VA11 | 1210VA11-3 | OB | UCB | Otu142 |
| Fall | VA11 | 1210VA11-44 | CYA | Cyanobacteria | Otu143 |
| Fall | VA11 | 1210VA11-32 | OB | Candidate | Otu144 |
| Fall | VA11 | 1210VA11-35 | CYA | Cyanobacteria | Otu145 |
| Summer | VA10 | 1207VA10-14 | OB | Candidate | Otu146 |
| Summer | VA10 | 1207VA10-102 | OB | Candidate | Otu147 |
| Summer | VA11 | 1207VA11-42 | OB | UCB | Otu148 |
| Summer | VA11 | 1207VA11-62 | OB | UCB | Otu149 |
| Fall | VA11 | 1210VA11-62 | OB | UCB | Otu150 |
| Summer | VA11 | 1207VA11-56 | OB | UCB | Otu151 |
| Summer | VA11 | 1207VA11-55 | OB | Candidate | Otu152 |
| Summer | VA11 | 1207VA11-53 | OB | Candidate | Otu153 |
| Summer | VA11 | 1207VA11-52 | OB | UCB | Otu154 |
| Summer | VA11 | 1207VA11-46 | OB | UCB | Otu155 |
| Summer | VA11 | 1207VA11-43 | OB | UCB | Otu156 |
| Summer | VA11 | 1207VA11-64 | OB | UCB | Otu157 |
| Summer | VA11 | 1207VA11-41 | OB | Candidate | Otu158 |
| Summer | VA11 | 1207VA11-34 | OB | UCB | Otu159 |
| Summer | VA11 | 1207VA11-31 | OB | UCB | Otu160 |
| Summer | VA11 | 1207VA11-29 | OB | UCB | Otu161 |
| Fall | VA11 | 1210VA11-69 | OB | UCB | Otu162 |
| Summer | VA11 | 1207VA11-24 | OB | UCB | Otu163 |
| Summer | VA11 | 1207VA11-21 | OB | UCB | Otu164 |
| Summer | VA11 | 1207VA11-79 | OB | UCB | Otu165 |
| Summer | VA11 | 1207VA11-91 | OB | UCB | Otu166 |
| Summer | VA11 | 1207VA11-9 | OB | UCB | Otu167 |
| Summer | VA11 | 1207VA11-89 | OB | UCB | Otu168 |
| Fall | VA11 | 1210VA11-167 | CYA | UCC | Otu169 |
| Summer | VA11 | 1207VA11-85 | OB | UCB | Otu170 |
| Summer | VA11 | 1207VA11-82 | OB | UCB | Otu171 |
| Summer | VA11 | 1207VA11-8 | OB | UCB | Otu172 |
| Summer | VA11 | 1207VA11-93 | OB | UCB | Otu173 |
| Summer | VA11 | 1207VA11-78 | CYA | Cyanobacteria | Otu174 |
| Summer | VA11 | 1207VA11-75 | OB | Candidate | Otu175 |
| Fall | VA11 | 1210VA11-55 | CYA | Cyanobacteria | Otu176 |
| Summer | VA11 | 1207VA11-73 | OB | UCB | Otu177 |
| Summer | VA11 | 1207VA11-72 | OB | UCB | Otu178 |
| Summer | VA11 | 1207VA11-7 | OB | UCB | Otu179 |
| Summer | VA11 | 1207VA11-66 | OB | UCB | Otu180 |
| Fall | VA11 | 1210VA11-101 | OB | UCB | Otu181 |
| Summer | VA10 | 1207VA10-97n | OB | UCB | Otu182 |
| Summer | VA10 | 1207VA10-97 | OB | Candidate | Otu183 |
| Summer | VA10 | 1207VA10-96 | OB | UCB | Otu184 |
| Summer | VA10 | 1207VA10-95 | OB | UCB | Otu185 |
| Summer | VA10 | 1207VA10-90 | OB | UCB | Otu186 |
| Summer | VA10 | 1207VA10-9 | OB | UCB | Otu187 |
| Summer | VA10 | 1207VA10-89 | OB | UCB | Otu188 |
| Fall | VA11 | 1210VA11-100 | OB | UCB | Otu189 |
| Summer | VA10 | 1207VA10-87 | OB | UCB | Otu190 |
| Summer | VA10 | 1207VA10-82 | OB | UCB | Otu191 |
| Summer | VA10 | 1207VA10-81 | OB | Candidate | Otu192 |
| Fall | VA11 | 1210VA11-112 | OB | UCB | Otu193 |
| Fall | VA11 | 1210VA11-118 | OB | UCB | Otu194 |
| Summer | VA10 | 1207VA10-80 | CYA | Cyanobacteria | Otu195 |
| Fall | VA12 | 1210VA12-60 | CYA | Microcystis | Otu196 |
| Spring | VA12 | 1204VA12-22 | OB | UCB | Otu197 |
| Summer | VA10 | 1207VA10-70 | OB | UCB | Otu198 |
| Fall | VA12 | 1210VA12-105 | CYA | Cyanobacteria | Otu199 |
| Spring | VA13 | 1204VA13-94 | OB | UCB | Otu200 |
| Fall | VA12 | 1210VA12-109n | CYA | Cyanobacteria | Otu201 |
| Fall | VA12 | 1210VA12-39 | CYA | Cyanobacteria | Otu202 |
| Spring | VA13 | 1204VA13-83 | EP | UCE | Otu203 |
| Fall | VA12 | 1210VA12-41 | CYA | Cyanobacteria | Otu204 |
| Summer | VA10 | 1207VA10-78 | CYA | UCC | Otu205 |
| Fall | VA12 | 1210VA12-77 | CYA | Cyanobacteria | Otu206 |
| Spring | VA13 | 1204VA13-33 | EP | UCE | Otu207 |
| Fall | VA12 | 1210VA12-79 | OB | UCB | Otu208 |
| Fall | VA12 | 1210VA12-94 | CYA | Cyanobacteria | Otu209 |
| Spring | VA13 | 1204VA13-1n | OB | UCB | Otu210 |
| Fall | VA12 | 1210VA12-97 | CYA | Cyanobacteria | Otu211 |
| Fall | VA12 | 1210VA12-99 | EP | UCE | Otu212 |
| Fall | VA11 | 1210VA11-10 | OB | UCB | Otu213 |
| Summer | VA10 | 1207VA10-40 | OB | UCB | Otu214 |
| Summer | VA10 | 1207VA10-56 | OB | Firmicutes | Otu215 |
| Summer | VA10 | 1207VA10-53 | OB | UCB | Otu216 |
| Summer | VA10 | 1207VA10-47 | OB | Deinococcus | Otu217 |
| Summer | VA10 | 1207VA10-46 | OB | Candidate | Otu218 |
| Summer | VA10 | 1207VA10-45 | OB | UCB | Otu219 |
| Summer | VA10 | 1207VA10-44 | OB | UCB | Otu220 |
| Fall | VA11 | 1210VA11-151 | EP | Stramenopila | Otu221 |
| Fall | VA11 | 1210VA11-153 | OB | UCB | Otu222 |
| Summer | VA10 | 1207VA10-57 | OB | UCB | Otu223 |
| Summer | VA10 | 1207VA10-4 | OB | UCB | Otu224 |
| Fall | VA11 | 1210VA11-155 | OB | UCB | Otu225 |
| Summer | VA10 | 1207VA10-38 | OB | UCB | Otu226 |
| Fall | VA11 | 1210VA11-78 | EP | Stramenopila | Otu227 |
| Summer | VA10 | 1207VA10-35 | OB | UCB | Otu228 |
| Summer | VA10 | 1207VA10-34 | OB | UCB | Otu229 |
| Fall | VA11 | 1210VA11-168 | CYA | UCC | Otu230 |
| Summer | VA10 | 1207VA10-30 | OB | UCB | Otu231 |
| Fall | VA11 | 1210VA11-141 | OB | UCB | Otu232 |
| Fall | VA11 | 1210VA11-12 | OB | UCB | Otu233 |
| Fall | VA11 | 1210VA11-135 | OB | UCB | Otu234 |
| Summer | VA10 | 1207VA10-76 | OB | UCB | Otu235 |
| Fall | VA11 | 1210VA11-138 | OB | Candidate | Otu236 |
| Summer | VA10 | 1207VA10-75 | CYA | Nostoc | Otu237 |
| Fall | VA11 | 1210VA11-14 | OB | UCB | Otu238 |
| Summer | VA10 | 1207VA10-74 | OB | UCB | Otu239 |
| Summer | VA10 | 1207VA10-72 | OB | UCB | Otu240 |
| Summer | VA10 | 1207VA10-29 | OB | UCB | Otu241 |
| Summer | VA10 | 1207VA10-7 | OB | UCB | Otu242 |
| Summer | VA10 | 1207VA10-69 | OB | UCB | Otu243 |
| Summer | VA10 | 1207VA10-68 | EP | Chlorophyta | Otu244 |
| Summer | VA10 | 1207VA10-65 | CYA | Nostoc | Otu245 |
| Summer | VA10 | 1207VA10-63 | OB | UCB | Otu246 |
| Fall | VA11 | 1210VA11-149 | OB | Candidate | Otu247 |
| Summer | VA10 | 1207VA10-58 | OB | Candidate | Otu248 |
| Fall | VA10 | 1210VA10-70 | CYA | UCC | Otu249 |
| Summer | VA13 | 1207VA13-101 | CYA | Microcystis | Otu250 |
| Fall | VA10 | 1210VA10-99 | OB | UCB | Otu251 |
| Fall | VA10 | 1210VA10-93 | OB | UCB | Otu252 |
| Fall | VA10 | 1210VA10-92 | OB | UCB | Otu253 |
| Fall | VA10 | 1210VA10-83 | OB | UCB | Otu254 |
| Fall | VA10 | 1210VA10-79 | OB | UCB | Otu255 |
| Fall | VA10 | 1210VA10-73 | OB | Nitrospirae | Otu256 |
| Fall | VA10 | 1210VA10-128 | OB | UCB | Otu257 |
| Summer | VA13 | 1207VA13-11 | CYA | UCC | Otu258 |
| Fall | VA10 | 1210VA10-129 | OB | UCB | Otu259 |
| Fall | VA10 | 1210VA10-62 | CYA | UCC | Otu260 |
| Fall | VA10 | 1210VA10-58 | OB | UCB | Otu261 |
| Fall | VA10 | 1210VA10-56 | OB | UCB | Otu262 |
| Fall | VA10 | 1210VA10-53 | OB | UCB | Otu263 |
| Fall | VA10 | 1210VA10-131 | OB | UCB | Otu264 |
| Fall | VA10 | 1210VA10-50 | OB | UCB | Otu265 |
| Fall | VA10 | 1210VA10-47 | OB | Nitrospirae | Otu266 |
| Fall | VA10 | 1210VA10-114 | OB | Candidate | Otu267 |
| Summer | VA13 | 1207VA13-50 | CYA | UCC | Otu268 |
| Summer | VA13 | 1207VA13-5 | CYA | Cylindrospermosis | Otu269 |
| Fall | VA10 | 1210VA10-113 | CYA | UCC | Otu270 |
| Summer | VA13 | 1207VA13-42 | CYA | Microcystis | Otu271 |
| Summer | VA13 | 1207VA13-41 | CYA | Aphanizomenon | Otu272 |
| Summer | VA13 | 1207VA13-37 | CYA | Microcystis | Otu273 |
| Summer | VA13 | 1207VA13-36 | CYA | Microcystis | Otu274 |
| Summer | VA13 | 1207VA13-29 | CYA | Microcystis | Otu275 |
| Summer | VA13 | 1207VA13-26n | CYA | UCC | Otu276 |
| Fall | VA10 | 1210VA10-132 | OB | UCB | Otu277 |
| Summer | VA13 | 1207VA13-26 | CYA | UCC | Otu278 |
| Summer | VA13 | 1207VA13-25 | OB | Firmicutes | Otu279 |
| Fall | VA10 | 1210VA10-115 | OB | UCB | Otu280 |
| Summer | VA13 | 1207VA13-20n | CYA | Synechococcus | Otu281 |
| Summer | VA13 | 1207VA13-20 | CYA | Synechococcus | Otu282 |
| Fall | VA10 | 1210VA10-119 | OB | Candidate | Otu283 |
| Fall | VA10 | 1210VA10-121 | OB | Candidate | Otu284 |
| Summer | VA13 | 1207VA13-13 | CYA | Synechococcus | Otu285 |
| Fall | VA10 | 1210VA10-183 | OB | UCB | Otu286 |
| Fall | VA10 | 1210VA10-181 | OB | Candidate | Otu287 |
| Fall | VA10 | 1210VA10-180 | OB | UCB | Otu288 |
| Fall | VA10 | 1210VA10-137 | OB | UCB | Otu289 |
| Fall | VA10 | 1210VA10-18 | OB | UCB | Otu290 |
| Fall | VA10 | 1210VA10-178 | OB | UCB | Otu291 |
| Fall | VA10 | 1210VA10-176 | OB | UCB | Otu292 |
| Fall | VA10 | 1210VA10-175 | OB | UCB | Otu293 |
| Fall | VA10 | 1210VA10-174 | OB | UCB | Otu294 |
| Fall | VA10 | 1210VA10-184 | CYA | Phormidium | Otu295 |
| Fall | VA10 | 1210VA10-17 | CYA | Cyanobacteria | Otu296 |
| Fall | VA10 | 1210VA10-139 | OB | UCB | Otu297 |
| Fall | VA10 | 1210VA10-163 | OB | UCB | Otu298 |
| Fall | VA10 | 1210VA10-161 | OB | UCB | Otu299 |
| Fall | VA10 | 1210VA10-158 | OB | Candidate | Otu300 |
| Fall | VA10 | 1210VA10-144 | OB | UCB | Otu301 |
| Fall | VA10 | 1210VA10-155 | OB | UCB | Otu302 |
| Fall | VA10 | 1210VA10-148 | OB | UCB | Otu303 |
| Fall | VA10 | 1210VA10-24 | OB | UCB | Otu304 |
| Fall | VA10 | 1210VA10-41 | OB | UCB | Otu305 |
| Fall | VA10 | 1210VA10-39 | OB | UCB | Otu306 |
| Fall | VA10 | 1210VA10-38 | OB | UCB | Otu307 |
| Fall | VA10 | 1210VA10-133 | OB | UCB | Otu308 |
| Fall | VA10 | 1210VA10-134 | OB | UCB | Otu309 |
| Fall | VA10 | 1210VA10-33 | OB | UCB | Otu310 |
| Fall | VA10 | 1210VA10-28n | OB | UCB | Otu311 |
| Fall | VA10 | 1210VA10-28 | OB | UCB | Otu312 |
| Summer | VA13 | 1207VA13-55 | OB | UCB | Otu313 |
| Fall | VA10 | 1210VA10-23n | OB | UCB | Otu314 |
| Fall | VA10 | 1210VA10-23 | OB | UCB | Otu315 |
| Fall | VA10 | 1210VA10-198 | OB | UCB | Otu316 |
| Fall | VA10 | 1210VA10-197 | OB | UCB | Otu317 |
| Fall | VA10 | 1210VA10-193 | OB | UCB | Otu318 |
| Fall | VA10 | 1210VA10-136 | OB | UCB | Otu319 |
| Fall | VA10 | 1210VA10-188 | OB | UCB | Otu320 |
| Fall | VA10 | 1210VA10-186 | OB | UCB | Otu321 |
| Summer | VA12 | 1207VA12-61 | OB | Pelotomaculum | Otu322 |
| Fall | VA11 | 1210VA11-85 | OB | UCB | Otu323 |
| Summer | VA12 | 1207VA12-68 | OB | UCB | Otu324 |
| Fall | VA11 | 1210VA11-91 | OB | Acidobacteria | Otu325 |
| Summer | VA12 | 1207VA12-67 | OB | UCB | Otu326 |
| Summer | VA12 | 1207VA12-64 | OB | Candidate | Otu327 |
| Summer | VA12 | 1207VA12-63 | CYA | UCC | Otu328 |
| Summer | VA12 | 1207VA12-62 | OB | UCB | Otu329 |
| Fall | VA11 | 1210VA11-99 | OB | Acidobacteria | Otu330 |
| Summer | VA12 | 1207VA12-71 | OB | UCB | Otu331 |
| Summer | VA12 | 1207VA12-60 | OB | UCB | Otu332 |
| Summer | VA12 | 1207VA12-6 | CYA | Synechococcus | Otu333 |
| Summer | VA12 | 1207VA12-58 | CYA | Cyanobacteria | Otu334 |
| Summer | VA12 | 1207VA12-56 | OB | UCB | Otu335 |
| Summer | VA12 | 1207VA12-54 | OB | UCB | Otu336 |
| Summer | VA12 | 1207VA12-52 | OB | UCB | Otu337 |
| Fall | VA10 | 1210VA10-1 | OB | UCB | Otu338 |
| Summer | VA11 | 1207VA11-1 | OB | UCB | Otu339 |
| Summer | VA11 | 1207VA11-19 | OB | UCB | Otu340 |
| Fall | VA11 | 1210VA11-70 | CYA | UCC | Otu341 |
| Fall | VA11 | 1210VA11-79 | OB | UCB | Otu342 |
| Summer | VA11 | 1207VA11-105 | OB | UCB | Otu343 |
| Summer | VA11 | 1207VA11-103 | OB | UCB | Otu344 |
| Summer | VA11 | 1207VA11-102 | OB | UCB | Otu345 |
| Summer | VA11 | 1207VA11-101 | OB | UCB | Otu346 |
| Summer | VA12 | 1207VA12-50 | OB | Candidate | Otu347 |
| Fall | VA11 | 1210VA11-80 | OB | UCB | Otu348 |
| Summer | VA12 | 1207VA12-85 | OB | UCB | Otu349 |
| Fall | VA11 | 1210VA11-84 | OB | Candidate | Otu350 |
| Summer | VA12 | 1207VA12-76 | OB | UCB | Otu351 |
| Summer | VA12 | 1207VA12-74 | OB | UCB | Otu352 |
| Summer | VA12 | 1207VA12-72 | OB | UCB | Otu353 |
| Summer | VA13 | 1207VA13-77 | OB | UCB | Otu354 |
| Summer | VA12 | 1207VA12-110 | OB | UCB | Otu355 |
| Summer | VA12 | 1207VA12-109 | OB | UCB | Otu356 |
| Summer | VA12 | 1207VA12-108 | OB | UCB | Otu357 |
| Fall | VA10 | 1210VA10-109 | OB | UCB | Otu358 |
| Summer | VA12 | 1207VA12-107 | OB | UCB | Otu359 |
| Summer | VA13 | 1207VA13-92 | CYA | Limnothrix | Otu360 |
| Summer | VA13 | 1207VA13-91 | CYA | Aphanizomenon | Otu361 |
| Summer | VA13 | 1207VA13-9 | CYA | Aphanizomenon | Otu362 |
| Fall | VA10 | 1210VA10-110 | OB | UCB | Otu363 |
| Summer | VA12 | 1207VA12-111 | OB | UCB | Otu364 |
| Summer | VA13 | 1207VA13-72 | OB | UCB | Otu365 |
| Summer | VA13 | 1207VA13-71 | CYA | Microcystis | Otu366 |
| Summer | VA13 | 1207VA13-70 | CYA | Microcystis | Otu367 |
| Summer | VA13 | 1207VA13-65 | CYA | Microcystis | Otu368 |
| Summer | VA13 | 1207VA13-62 | OB | UCB | Otu369 |
| Summer | VA13 | 1207VA13-5n | CYA | Synechococcus | Otu370 |
| Summer | VA13 | 1207VA13-56n | CYA | Planktothrix | Otu371 |
| Summer | VA13 | 1207VA13-56 | CYA | UCC | Otu372 |
| Summer | VA12 | 1207VA12-122 | CYA | UCC | Otu373 |
| Fall | VA10 | 1210VA10-100 | OB | UCB | Otu374 |
| Summer | VA12 | 1207VA12-46 | OB | UCB | Otu375 |
| Summer | VA12 | 1207VA12-39 | CYA | Cyanobacteria | Otu376 |
| Fall | VA10 | 1210VA10-100n | OB | UCB | Otu377 |
| Summer | VA12 | 1207VA12-3 | OB | UCB | Otu378 |
| Summer | VA12 | 1207VA12-29 | CYA | Microcystis | Otu379 |
| Summer | VA12 | 1207VA12-24 | OB | UCB | Otu380 |
| Summer | VA12 | 1207VA12-127 | OB | UCB | Otu381 |
| Summer | VA11 | 1207VA11-20 | OB | Candidate | Otu382 |
| Summer | VA12 | 1207VA12-121 | OB | UCB | Otu383 |
| Fall | VA10 | 1210VA10-101n | OB | UCB | Otu384 |
| Summer | VA12 | 1207VA12-119 | OB | UCB | Otu385 |
| Fall | VA10 | 1210VA10-102 | OB | UCB | Otu386 |
| Fall | VA10 | 1210VA10-108 | OB | Candidate | Otu387 |
| Spring | VA10 | 1204VA10-6 | CYA | MLE1-12 | Otu388 |
| Spring | VA10 | 1204VA10-3n | OB | UCB | Otu389 |
| Winter | VA10 | 1301VA10-15 | OB | UCB | Otu390 |
| Spring | VA10 | 1204VA10-42 | OB | UCB | Otu391 |
| Spring | VA10 | 1204VA10-44 | EP | Cryptophyta | Otu392 |
| Winter | VA10 | 1301VA10-147 | OB | UCB | Otu393 |
| Spring | VA10 | 1204VA10-46 | OB | UCB | Otu394 |
| Winter | VA10 | 1301VA10-146 | OB | UCB | Otu395 |
| Spring | VA10 | 1204VA10-48 | OB | UCB | Otu396 |
| Spring | VA10 | 1204VA10-49 | EP | Stramenopila | Otu397 |
| Spring | VA10 | 1204VA10-5 | OB | UCB | Otu398 |
| Spring | VA10 | 1204VA10-53 | OB | UCB | Otu399 |
| Winter | VA10 | 1301VA10-145 | OB | UCB | Otu400 |
| Winter | VA10 | 1301VA10-143 | CYA | MLE1-12 | Otu401 |
| Winter | VA10 | 1301VA10-142 | OB | UCB | Otu402 |
| Spring | VA10 | 1204VA10-60n | OB | UCB | Otu403 |
| Spring | VA10 | 1204VA10-62n | OB | UCB | Otu404 |
| Spring | VA10 | 1204VA10-64 | CYA | Chamaesiphon | Otu405 |
| Winter | VA10 | 1301VA10-140 | OB | UCB | Otu406 |
| Spring | VA10 | 1204VA10-66 | OB | Chloroflexi | Otu407 |
| Spring | VA10 | 1204VA10-67 | OB | UCB | Otu408 |
| Winter | VA10 | 1301VA10-139 | OB | UCB | Otu409 |
| Winter | VA10 | 1301VA10-138 | CYA | UCC | Otu410 |
| Spring | VA10 | 1204VA10-7 | OB | UCB | Otu411 |
| Winter | VA11 | 1301VA11-183 | EP | UCE | Otu412 |
| Spring | VA10 | 1204VA10-73n | OB | Candidate | Otu413 |
| Spring | VA10 | 1204VA10-20 | EP | UCE | Otu414 |
| Winter | VA10 | 1301VA10-179 | OB | UCB | Otu415 |
| Winter | VA11 | 1301VA11-171 | OB | UCB | Otu416 |
| Winter | VA10 | 1301VA10-176 | OB | UCB | Otu417 |
| Winter | VA10 | 1301VA10-175 | OB | UCB | Otu418 |
| Spring | VA10 | 1204VA10-103 | OB | UCB | Otu419 |
| Spring | VA10 | 1204VA10-11 | OB | Candidate | Otu420 |
| Winter | VA10 | 1301VA10-169 | OB | UCB | Otu421 |
| Spring | VA10 | 1204VA10-13 | OB | Firmicutes | Otu422 |
| Winter | VA11 | 1301VA11-175 | EP | UCE | Otu423 |
| Spring | VA10 | 1204VA10-15 | OB | UCB | Otu424 |
| Spring | VA10 | 1204VA10-16 | OB | UCB | Otu425 |
| Spring | VA10 | 1204VA10-19 | OB | UCB | Otu426 |
| Spring | VA10 | 1204VA10-2 | EP | Cryptophyta | Otu427 |
| Spring | VA10 | 1204VA10-75 | OB | Candidate | Otu428 |
| Spring | VA10 | 1204VA10-21 | EP | UCE | Otu429 |
| Spring | VA10 | 1204VA10-22 | OB | Candidate | Otu430 |
| Spring | VA10 | 1204VA10-24 | OB | UCB | Otu431 |
| Winter | VA10 | 1301VA10-161 | OB | UCB | Otu432 |
| Spring | VA10 | 1204VA10-25 | OB | UCB | Otu433 |
| Winter | VA10 | 1301VA10-158 | OB | UCB | Otu434 |
| Winter | VA10 | 1301VA10-154 | OB | UCB | Otu435 |
| Winter | VA10 | 1301VA10-153 | OB | Candidate | Otu436 |
| Winter | VA10 | 1301VA10-152 | OB | UCB | Otu437 |
| Spring | VA10 | 1204VA10-36 | OB | UCB | Otu438 |
| Winter | VA10 | 1301VA10-151 | OB | Chloroflexi | Otu439 |
| Spring | VA10 | 1204VA10-37 | OB | UCB | Otu440 |
| Winter | VA13 | 1301VA13-89n | EP | UCE | Otu441 |
| Winter | VA13 | 1301VA13-45n | EP | UCE | Otu442 |
| Winter | VA13 | 1301VA13-5 | CYA | UCC | Otu443 |
| Winter | VA11 | 1301VA11-98 | OB | UCB | Otu444 |
| Winter | VA11 | 1301VA11-94 | EP | Stramenopila | Otu445 |
| Winter | VA13 | 1301VA13-61 | EP | Stramenopila | Otu446 |
| Winter | VA11 | 1301VA11-92 | OB | Candidate | Otu447 |
| Winter | VA11 | 1301VA11-9 | CYA | MLE1-12 | Otu448 |
| Winter | VA11 | 1301VA11-84 | OB | UCB | Otu449 |
| Winter | VA11 | 1301VA11-82 | CYA | Cyanobacteria | Otu450 |
| Winter | VA12 | 1301VA12-112 | EP | Cryptophyta | Otu451 |
| Winter | VA11 | 1301VA11-79 | EP | Stramenopila | Otu452 |
| Winter | VA13 | 1301VA13-87n | EP | Stramenopila | Otu453 |
| Winter | VA10 | 1301VA10-104 | OB | UCB | Otu454 |
| Winter | VA12 | 1301VA12-111 | OB | UCB | Otu455 |
| Winter | VA12 | 1301VA12-107 | EP | Cryptophyta | Otu456 |
| Winter | VA11 | 1301VA11-74 | EP | Stramenopila | Otu457 |
| Winter | VA11 | 1301VA11-66 | OB | Candidate | Otu458 |
| Winter | VA11 | 1301VA11-59 | OB | UCB | Otu459 |
| Winter | VA11 | 1301VA11-57 | OB | WD272 | Otu460 |
| Winter | VA13 | 1301VA13-95n | EP | Chlorophyta | Otu461 |
| Winter | VA11 | 1301VA11-31 | CYA | UCC | Otu462 |
| Winter | VA11 | 1301VA11-37 | OB | Candidate | Otu463 |
| Winter | VA11 | 1301VA11-41 | OB | UCB | Otu464 |
| Winter | VA11 | 1301VA11-43 | OB | UCB | Otu465 |
| Winter | VA10 | 1301VA10-120 | CYA | UCC | Otu466 |
| Spring | VA10 | 1204VA10-82 | CYA | UCC | Otu467 |
| Spring | VA10 | 1204VA10-85 | OB | UCB | Otu468 |
| Winter | VA10 | 1301VA10-132 | OB | UCB | Otu469 |
| Winter | VA12 | 1301VA12-28 | EP | UCE | Otu470 |
| Winter | VA10 | 1301VA10-131 | OB | UCB | Otu471 |
| Spring | VA10 | 1204VA10-92 | CYA | UCC | Otu472 |
| Spring | VA10 | 1204VA10-93 | OB | UCB | Otu473 |
| Winter | VA10 | 1301VA10-130 | OB | UCB | Otu474 |
| Winter | VA10 | 1301VA10-128 | OB | Candidate | Otu475 |
| Winter | VA10 | 1301VA10-125 | OB | UCB | Otu476 |
| Winter | VA10 | 1301VA10-124 | OB | UCB | Otu477 |
| Winter | VA11 | 1301VA11-189 | EP | UCE | Otu478 |
| Winter | VA11 | 1301VA11-123 | OB | Candidate | Otu479 |
| Winter | VA11 | 1301VA11-190 | OB | UCB | Otu480 |
| Winter | VA10 | 1301VA10-12 | OB | UCB | Otu481 |
| Winter | VA10 | 1301VA10-119 | OB | UCB | Otu482 |
| Winter | VA12 | 1301VA12-114 | EP | Cryptophyta | Otu483 |
| Spring | VA10 | 1204VA10-98 | OB | UCB | Otu484 |
| Winter | VA10 | 1301VA10-112n | OB | UCB | Otu485 |
| Winter | VA10 | 1301VA10-112 | OB | UCB | Otu486 |
| Winter | VA13 | 1301VA13-24 | EP | UCE | Otu487 |
| Winter | VA10 | 1301VA10-111 | OB | UCB | Otu488 |
| Winter | VA10 | 1301VA10-109 | OB | Nitrospirae | Otu489 |
| Winter | VA10 | 1301VA10-108 | OB | Candidate | Otu490 |
| Winter | VA10 | 1301VA10-106 | OB | Candidate | Otu491 |
| Spring | VA11 | 1204VA11-26 | EP | UCE | Otu492 |
| Winter | VA11 | 1301VA11-144 | CYA | Cyanobacteria | Otu493 |
| Winter | VA11 | 1301VA11-146 | EP | Stramenopila | Otu494 |
| Winter | VA11 | 1301VA11-148 | EP | UCE | Otu495 |
| Winter | VA11 | 1301VA11-148n | EP | Stramenopila | Otu496 |
| Winter | VA11 | 1301VA11-149 | EP | Stramenopila | Otu497 |
| Spring | VA11 | 1204VA11-16n | OB | Candidate | Otu498 |
| Spring | VA11 | 1204VA11-18n | EP | UCE | Otu499 |
| Winter | VA10 | 1301VA10-70n | OB | UCB | Otu500 |
| Spring | VA11 | 1204VA11-2 | OB | UCB | Otu501 |
| Spring | VA11 | 1204VA11-20 | CYA | Nostocaceae | Otu502 |
| Spring | VA11 | 1204VA11-22 | OB | Candidate | Otu503 |
| Spring | VA11 | 1204VA11-24 | EP | UCE | Otu504 |
| Winter | VA10 | 1301VA10-78 | OB | UCB | Otu505 |
| Spring | VA11 | 1204VA11-27 | CYA | Pseudanabaenaceae | Otu506 |
| Spring | VA11 | 1204VA11-29 | OB | Candidate | Otu507 |
| Spring | VA11 | 1204VA11-3 | CYA | Leptolyngbya | Otu508 |
| Spring | VA11 | 1204VA11-30 | OB | Candidate | Otu509 |
| Winter | VA11 | 1301VA11-150 | EP | UCE | Otu510 |
| Winter | VA11 | 1301VA11-151 | OB | UCB | Otu511 |
| Winter | VA10 | 1301VA10-66 | OB | UCB | Otu512 |
| Spring | VA11 | 1204VA11-34 | CYA | Phormidium | Otu513 |
| Spring | VA11 | 1204VA11-36 | CYA | Xenococcaceae | Otu514 |
| Spring | VA11 | 1204VA11-3n2 | OB | Candidate | Otu515 |
| Spring | VA11 | 1204VA11-40 | EP | Chlorophyta | Otu516 |
| Winter | VA11 | 1301VA11-112 | CYA | MLE1-12 | Otu517 |
| Winter | VA11 | 1301VA11-131 | EP | UCE | Otu518 |
| Spring | VA12 | 1204VA12-35 | OB | UCB | Otu519 |
| Winter | VA11 | 1301VA11-131n | EP | UCE | Otu520 |
| Spring | VA12 | 1204VA12-3n | CYA | UCC | Otu521 |
| Winter | VA11 | 1301VA11-116 | EP | Chlorophyta | Otu522 |
| Spring | VA12 | 1204VA12-42 | OB | UCB | Otu523 |
| Spring | VA12 | 1204VA12-50 | OB | UCB | Otu524 |
| Spring | VA12 | 1204VA12-51 | EP | Stramenopila | Otu525 |
| Winter | VA10 | 1301VA10-98 | OB | UCB | Otu526 |
| Winter | VA11 | 1301VA11-135 | EP | Chlorophyta | Otu527 |
| Winter | VA11 | 1301VA11-137 | CYA | Cyanobacteria | Otu528 |
| Spring | VA12 | 1204VA12-65 | OB | UCB | Otu529 |
| Spring | VA10 | 1204VA10-1 | OB | UCB | Otu530 |
| Winter | VA11 | 1301VA11-138 | OB | UCB | Otu531 |
| Winter | VA11 | 1301VA11-139 | EP | UCE | Otu532 |
| Winter | VA10 | 1301VA10-92 | OB | UCB | Otu533 |
| Spring | VA12 | 1204VA12-80 | EP | Chlorophyta | Otu534 |
| Spring | VA12 | 1204VA12-83 | EP | UCE | Otu535 |
| Winter | VA11 | 1301VA11-141n | EP | Stramenopila | Otu536 |
| Winter | VA11 | 1301VA11-111n | EP | Chlorophyta | Otu537 |
| Winter | VA11 | 1301VA11-111 | EP | Chlorophyta | Otu538 |
| Winter | VA11 | 1301VA11-101 | OB | UCB | Otu539 |
| Spring | VA12 | 1204VA12-91 | OB | UCB | Otu540 |
| Winter | VA10 | 1301VA10-80 | OB | UCB | Otu541 |
| Spring | VA11 | 1204VA11-88 | CYA | UCC | Otu542 |
| Winter | VA11 | 1301VA11-164 | EP | UCE | Otu543 |
| Winter | VA11 | 1301VA11-166 | OB | UCB | Otu544 |
| Winter | VA10 | 1301VA10-192 | OB | UCB | Otu545 |
| Spring | VA11 | 1204VA11-83 | OB | UCB | Otu546 |
| Spring | VA11 | 1204VA11-84 | OB | Chloroflexi | Otu547 |
| Spring | VA11 | 1204VA11-85 | OB | Candidate | Otu548 |
| Winter | VA10 | 1301VA10-190 | EP | Cryptophyta | Otu549 |
| Spring | VA11 | 1204VA11-87 | EP | Stramenopila | Otu550 |
| Winter | VA10 | 1301VA10-63 | OB | UCB | Otu551 |
| Winter | VA10 | 1301VA10-188 | EP | Cryptophyta | Otu552 |
| Spring | VA11 | 1204VA11-92 | CYA | Leptolyngbya | Otu553 |
| Winter | VA10 | 1301VA10-186n | OB | Candidate | Otu554 |
| Winter | VA10 | 1301VA10-186 | OB | UCB | Otu555 |
| Spring | VA11 | 1204VA11-96 | CYA | Leptolyngbya | Otu556 |
| Winter | VA10 | 1301VA10-185 | OB | UCB | Otu557 |
| Winter | VA10 | 1301VA10-184 | OB | UCB | Otu558 |
| Winter | VA12 | 1301VA12-39 | EP | Chlorophyta | Otu559 |
| Winter | VA12 | 1301VA12-31 | CYA | UCC | Otu560 |
| Spring | VA10 | 1204VA10-10 | OB | UCB | Otu561 |
| Winter | VA10 | 1301VA10-40n | OB | UCB | Otu562 |
| Spring | VA11 | 1204VA11-56 | EP | Stramenopila | Otu563 |
| Spring | VA11 | 1204VA11-6 | CYA | Cyanobacteria | Otu564 |
| Spring | VA11 | 1204VA11-61 | EP | Stramenopila | Otu565 |
| Winter | VA11 | 1301VA11-153 | EP | Stramenopila | Otu566 |
| Winter | VA12 | 1301VA12-70 | EP | UCE | Otu567 |
| Spring | VA11 | 1204VA11-63 | EP | Stramenopila | Otu568 |
| Winter | VA12 | 1301VA12-69 | EP | UCE | Otu569 |
| Winter | VA11 | 1301VA11-161 | OB | WD272 | Otu570 |
| Winter | VA10 | 1301VA10-26 | OB | UCB | Otu571 |
| Winter | VA10 | 1301VA10-24 | OB | Candidate | Otu572 |
| Winter | VA10 | 1301VA10-22 | OB | UCB | Otu573 |
| Spring | VA11 | 1204VA11-77 | OB | Candidate | Otu574 |
| Spring | VA11 | 1204VA11-76 | EP | UCE | Otu575 |

**Table S2.** Non-metric multidimensional scaling (NMDS) ordination of the best taxa responsive to seasonal variation

| Taxon | NMDS1 | NMDS2 | r2 | Pr(>r) |
| --- | --- | --- | --- | --- |
| Candidate | 0.93911 | 0.34362 | 0.6906 | 0.001 *** |
| Chloroflexi | 0.83262 | 0.55384 | 0.3937 | 0.045 * |
| Cyanobacteria sp. | 0.02454 | 0.99970 | 0.1847 | 0.261 |
| Limnothrix | 0.41011 | 0.91203 | 0.4053 | 0.024 * |
| Microcystis | 0.70368 | 0.71052 | 0.7290 | 0.001 *** |
| Stramenopila | 0.30562 | 0.95215 | 0.2050 | 0.221 |
| UCB | 0.92115 | 0.38922 | 0.5962 | 0.004 ** |
| UCC | 0.87341 | 0.48698 | 0.2103 | 0.207 |

**Table S3.** Non-metric multidimensional scaling (NMDS) ordination of water quality parameters best fitting in seasonal dynamics of microbes

| Taxon | NMDS1 | NMDS2 | r2 | Pr(>r) |
| --- | --- | --- | --- | --- |
| Chlorphyll a | 0.68524 | 0.72832 | 0.1721 | 0.281 |
| Temp | 0.00207 | 1.00000 | 0.5092 ** | 0.009 ** |
| NH4 | -0.67705 | 0.73594 | 0.2263 | 0.197 |

**Figure S1.** Neighbor joining phylogenetic tree of OTUs based on16S rDNA sequences of microbial communities in the recycled irrigation system across seasons
